# Supplementary material for: Multifunctional Donepezil Analogues as Cholinesterase and BACE1 Inhibitors
Source: PubMed Central journal article supplement (PMC6321525; doi:10.3390/molecules23123252), 2018-12-08
Supplement: molecules-23-03252-s001.pdf [file molecules-23-03252-s001.pdf]

## Supplementary Materials

### Multifunctional donepezil analogues as cholinesterase and BACE1 inhibitors

Keith D. Green,<sup>a</sup> Marina Y. Fosso,<sup>a</sup> Sylvie Garneau-Tsodikova<sup>a,\*</sup>

<sup>a</sup> University of Kentucky, College of Pharmacy, Department of Pharmaceutical Sciences, Lexington, KY,  
USA, 40536-0596.

\*sylviegttsodikova@uky.edu

| Table of Content | Page # |
|------------------|--------|
| Figures S1-S88   | S1-S48 |

#### Figures S1-S88:

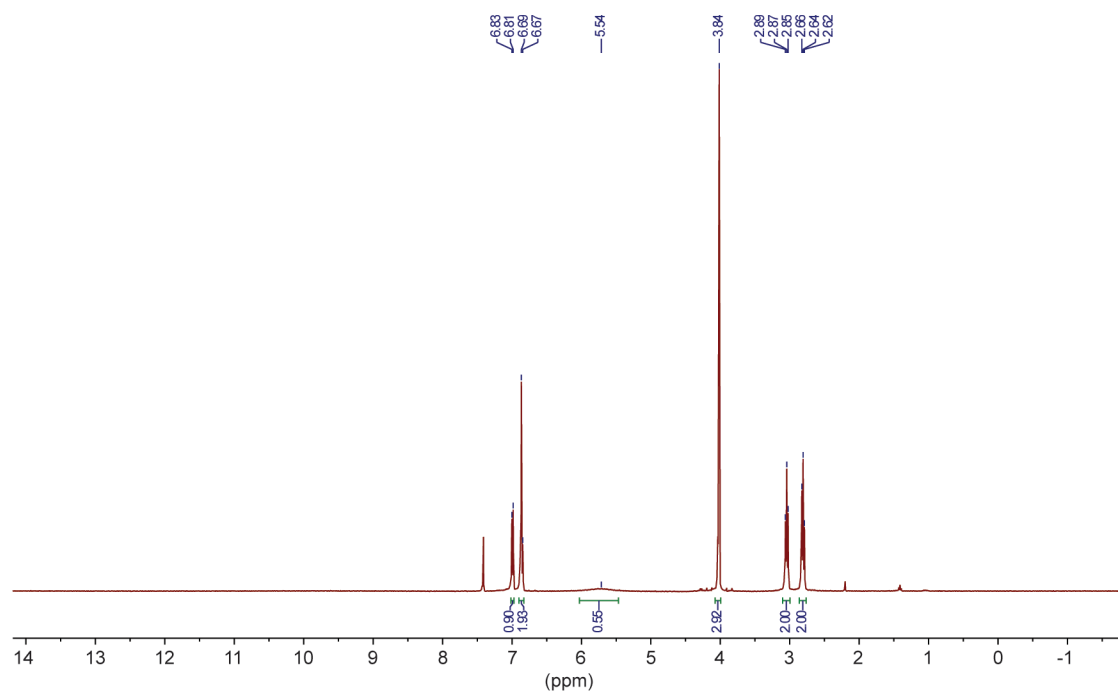

**Fig. S1:** <sup>1</sup>H NMR spectrum for compound 2 in CDCl<sub>3</sub> (400 MHz).

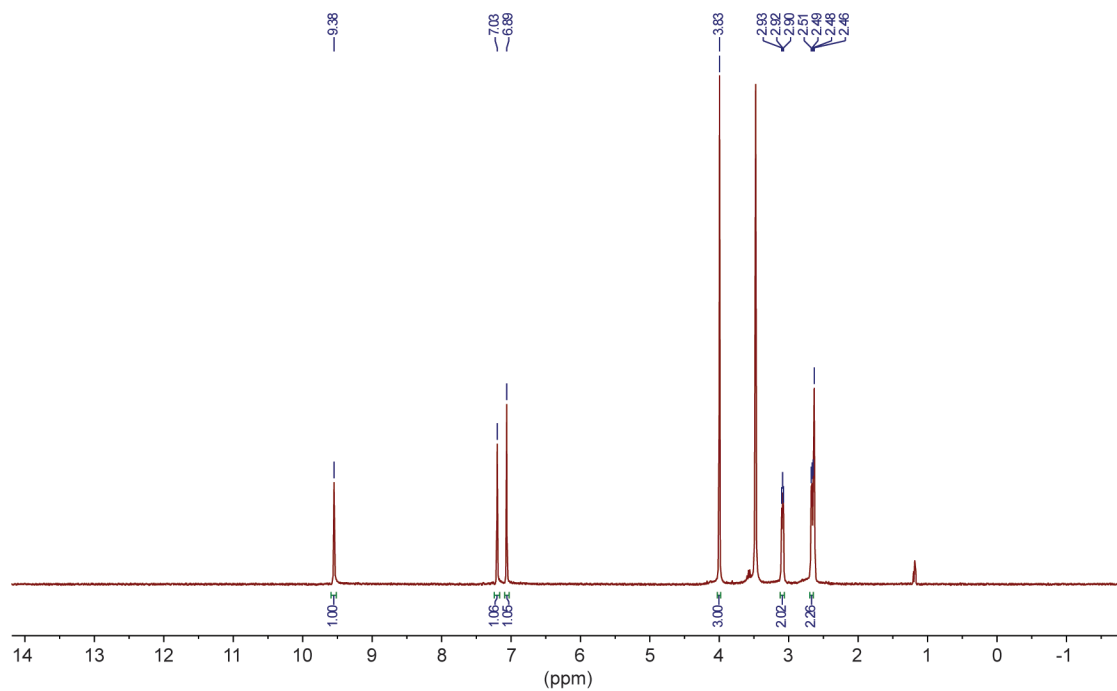

**Fig. S2:**  $^1\text{H}$  NMR spectrum for compound **3** in  $(\text{CD}_3)_2\text{SO}$  (400 MHz).

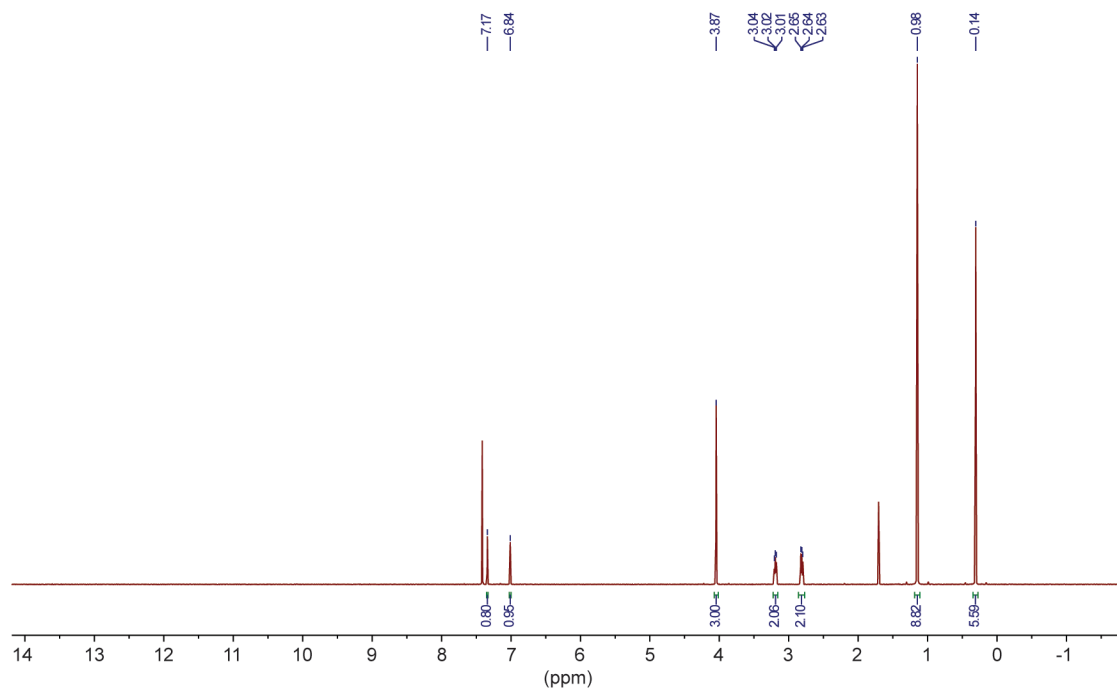

**Fig. S3:**  $^1\text{H}$  NMR spectrum for compound **4** in  $\text{CDCl}_3$  (400 MHz).

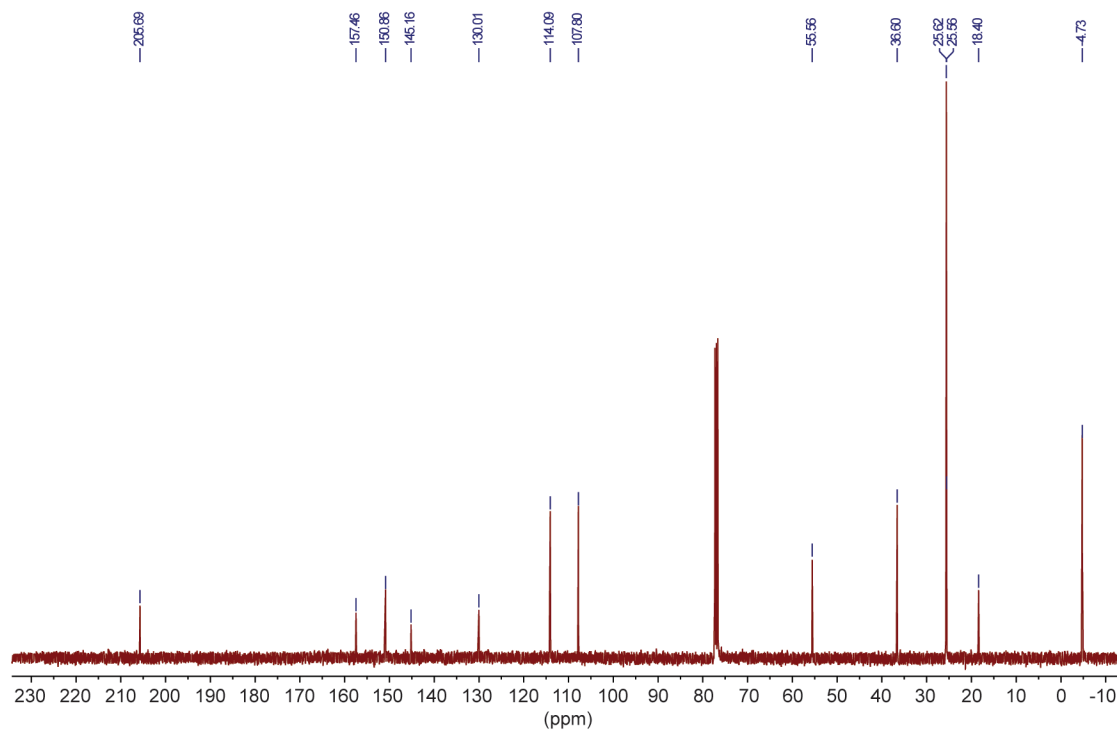

Fig. S4:  $^{13}\text{C}$  NMR spectrum for compound **4** in  $\text{CDCl}_3$  (100 MHz).

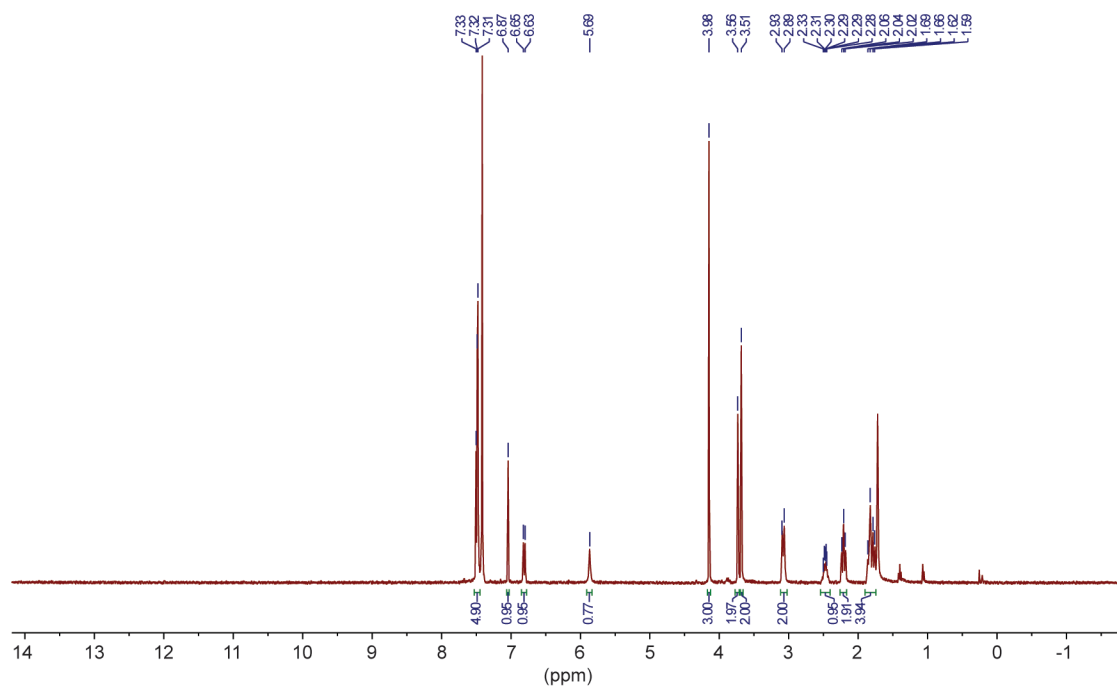

Fig. S5:  $^1\text{H}$  NMR spectrum for compound **6** in  $\text{CDCl}_3$  (400 MHz).

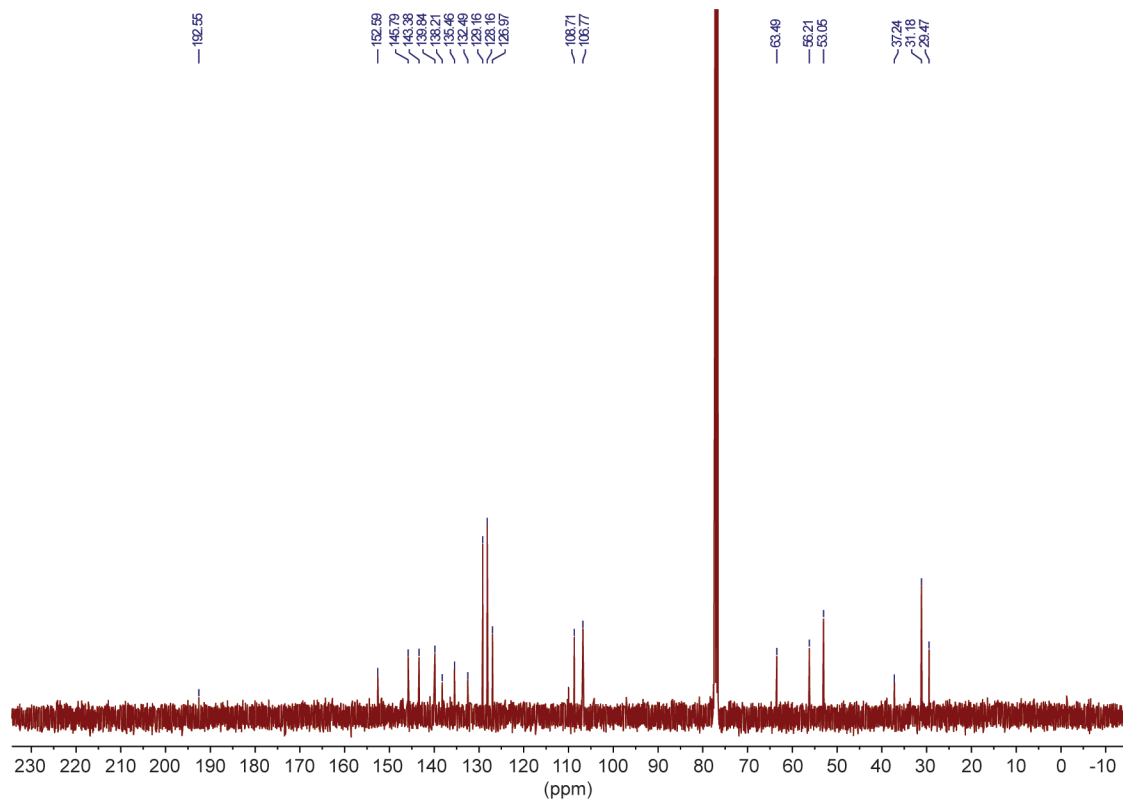

Fig. S6:  $^{13}\text{C}$  NMR spectrum for compound **6** in  $\text{CDCl}_3$  (100 MHz).

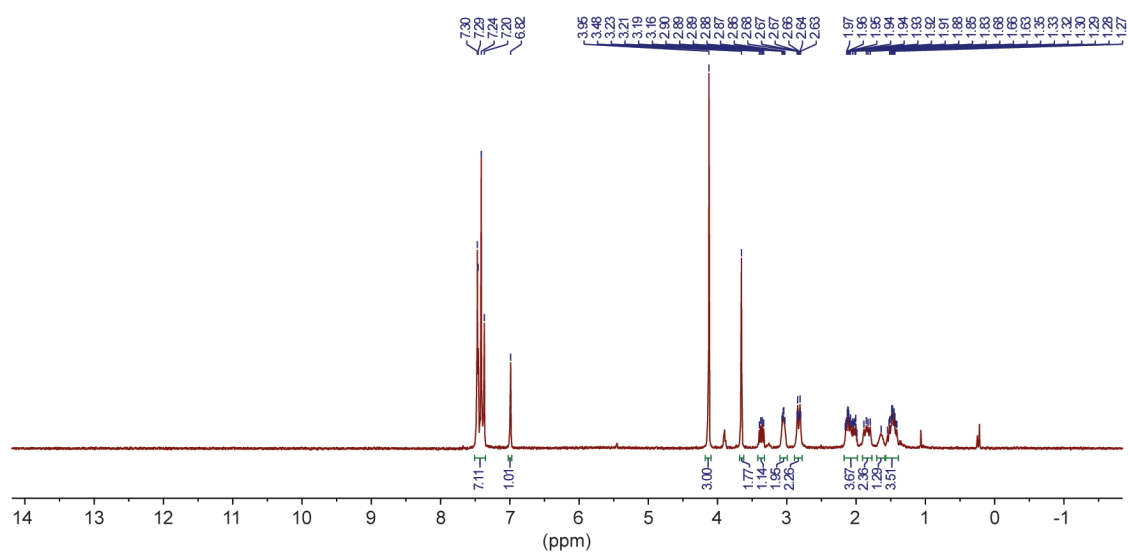

Fig. S7:  $^1\text{H}$  NMR spectrum for compound **7** in  $\text{CDCl}_3$  (400 MHz).

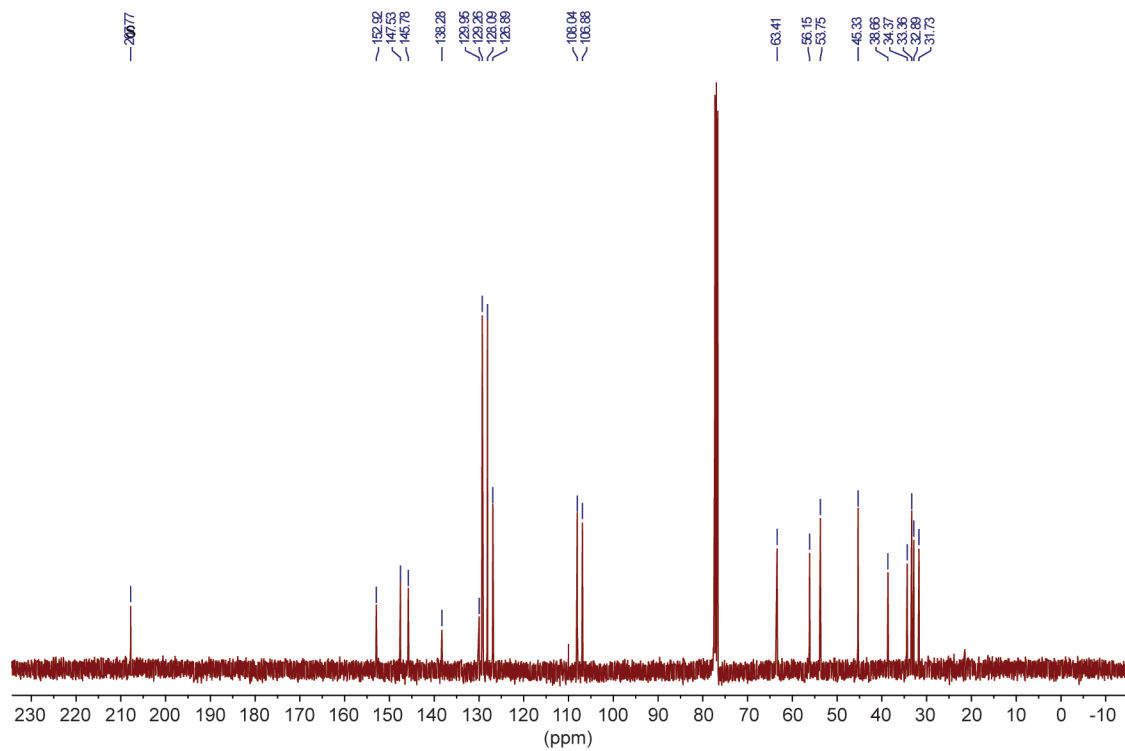

**Fig. S8:** <sup>13</sup>C NMR spectrum for compound **7** in CDCl<sub>3</sub> (100 MHz).

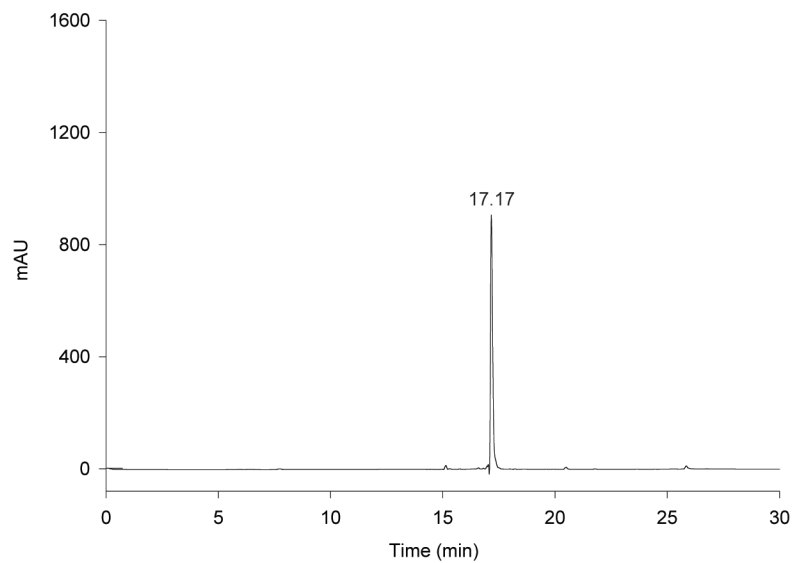

**Fig. S9:** HPLC trace for compound **7**.  $R_t = 17.17$  min.

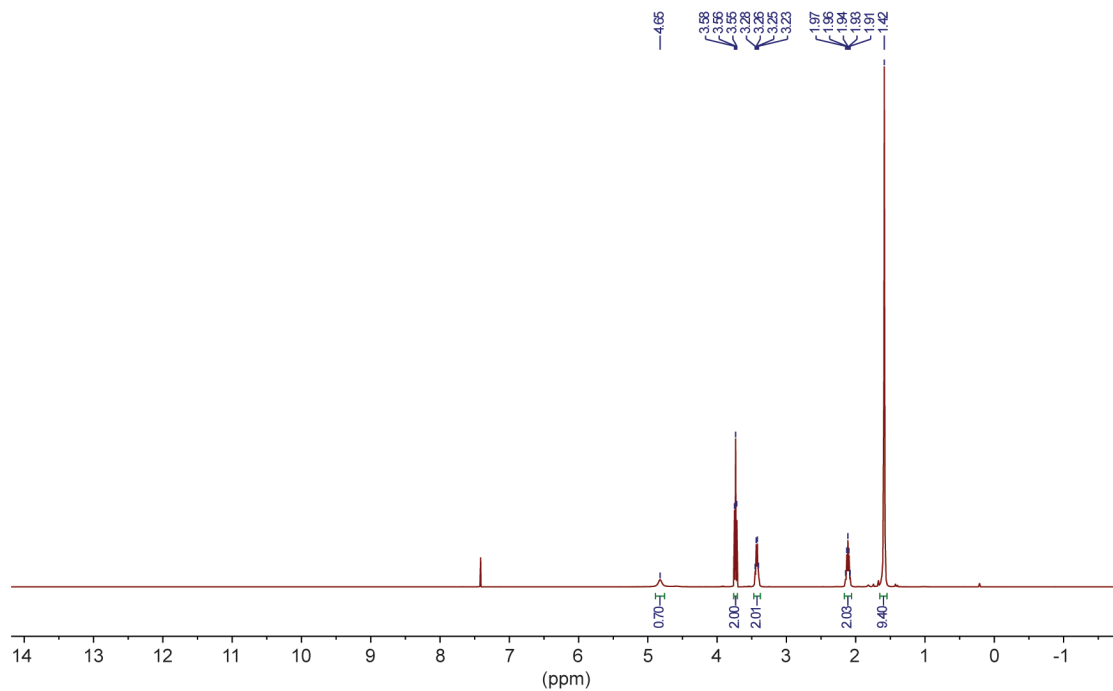

**Fig. S10:**  $^1\text{H}$  NMR spectrum for *tert*-butyl *N*-(3-chloropropyl)carbamate in  $\text{CDCl}_3$  (400 MHz).

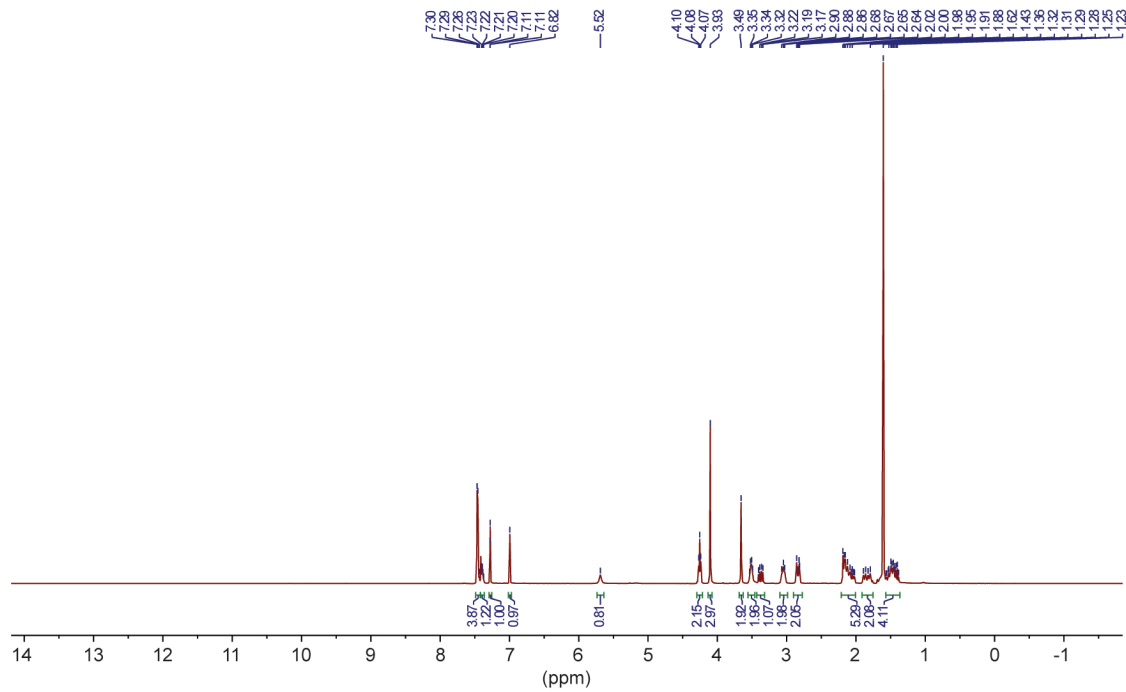

**Fig. S11:**  $^1\text{H}$  NMR spectrum for Boc-protected compound **8a** in  $\text{CDCl}_3$  (400 MHz).

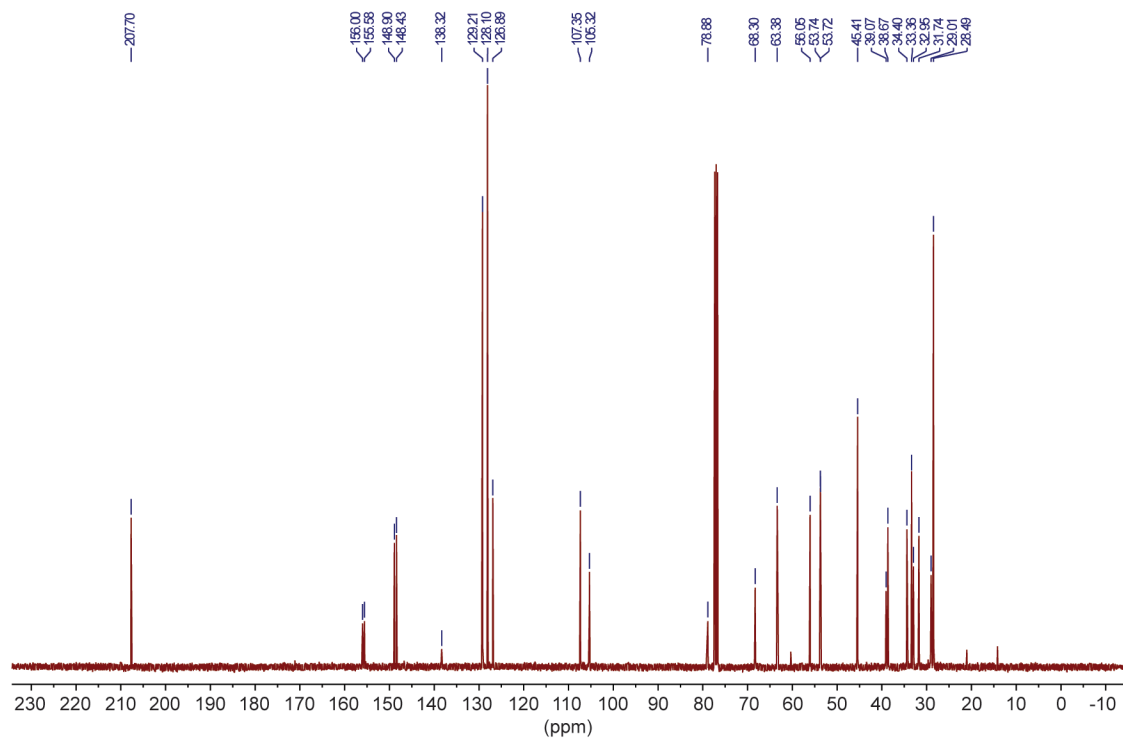

Fig. S12:  $^{13}\text{C}$  NMR spectrum for Boc-protected compound **8a** in  $\text{CDCl}_3$  (100 MHz).

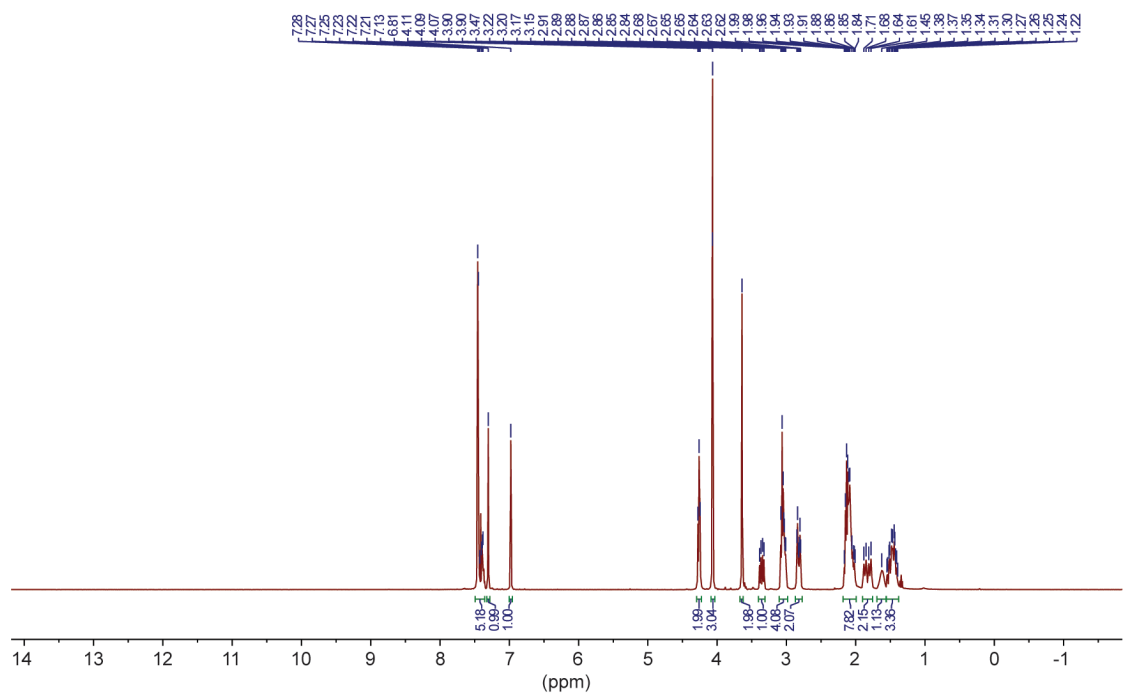

Fig. S13:  $^1\text{H}$  NMR spectrum for compound **8a** in  $\text{CDCl}_3$  (400 MHz).

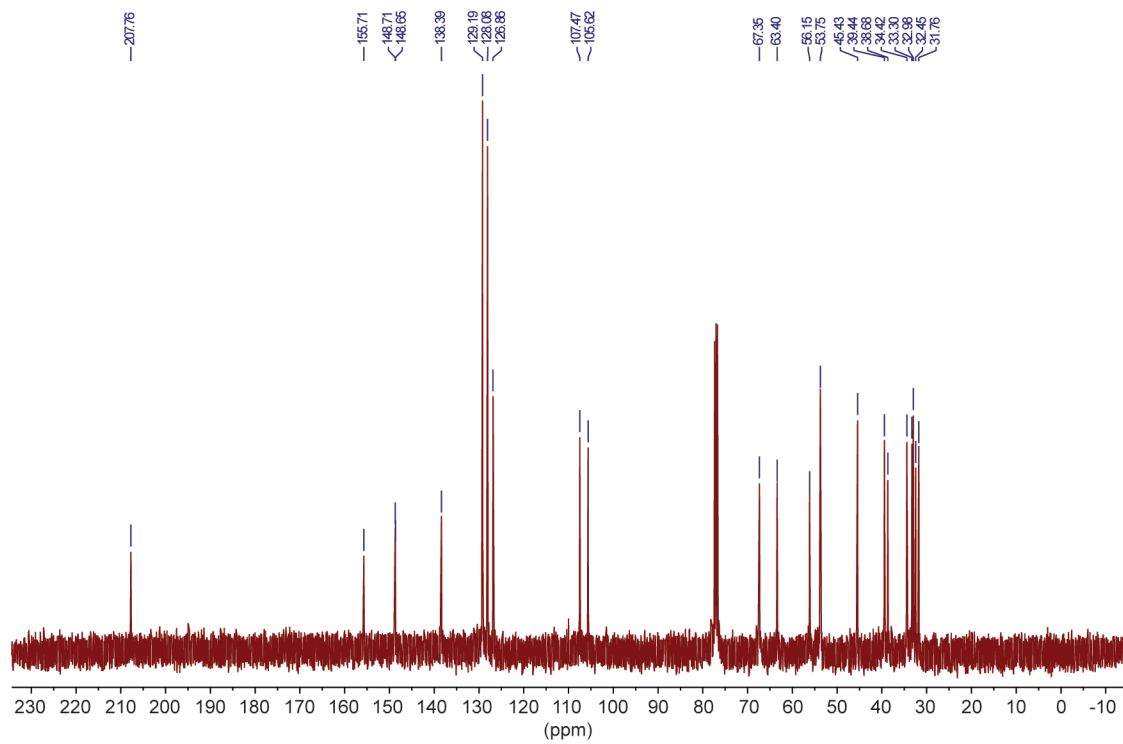

**Fig. S14:**  $^{13}\text{C}$  NMR spectrum for compound **8a** in  $\text{CDCl}_3$  (100 MHz).

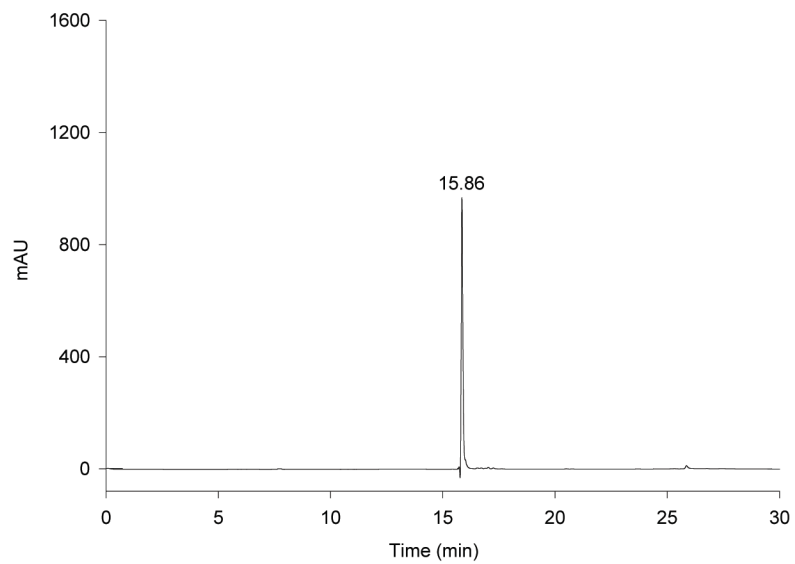

**Fig. S15:** HPLC trace for compound **8a**.  $R_t = 15.86$  min.



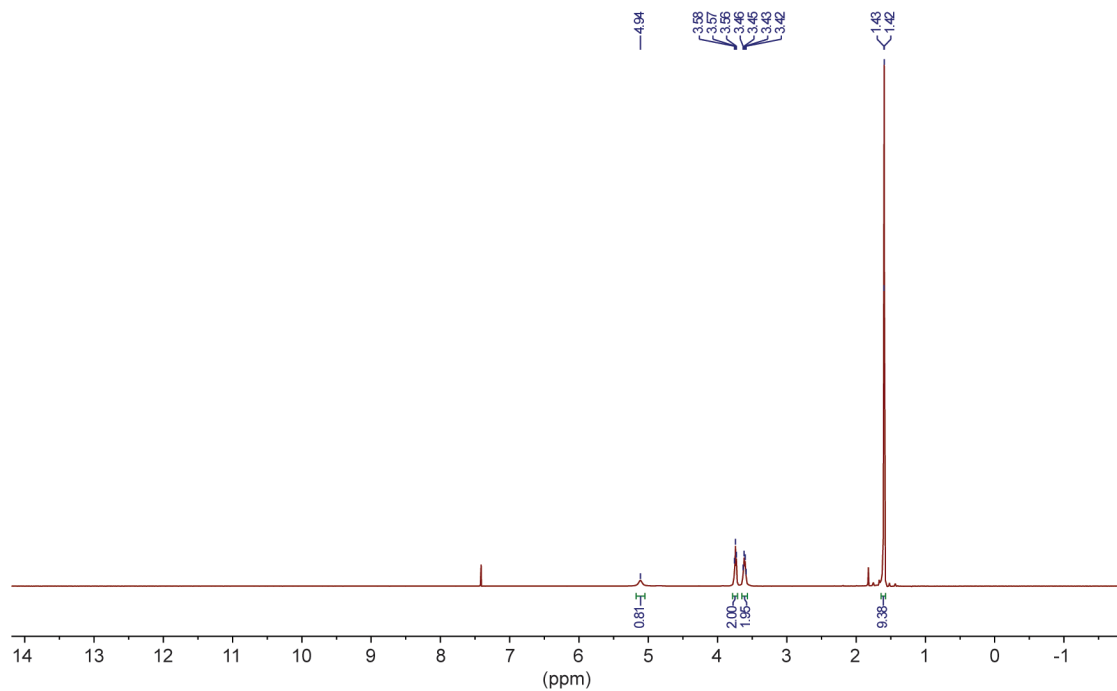

**Fig. S16:**  $^1\text{H}$  NMR spectrum for *tert*-butyl *N*-(2-chloroethyl)carbamate in  $\text{CDCl}_3$  (400 MHz).

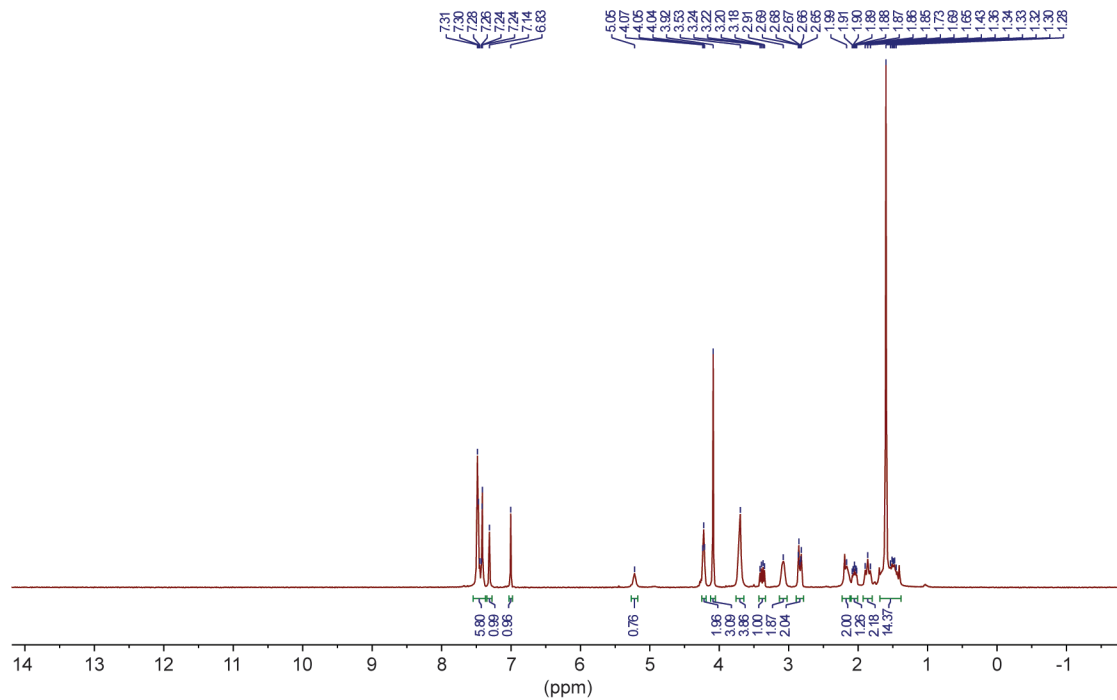

**Fig. S17:**  $^1\text{H}$  NMR spectrum for Boc-protected compound **8b** in  $\text{CDCl}_3$  (400 MHz).

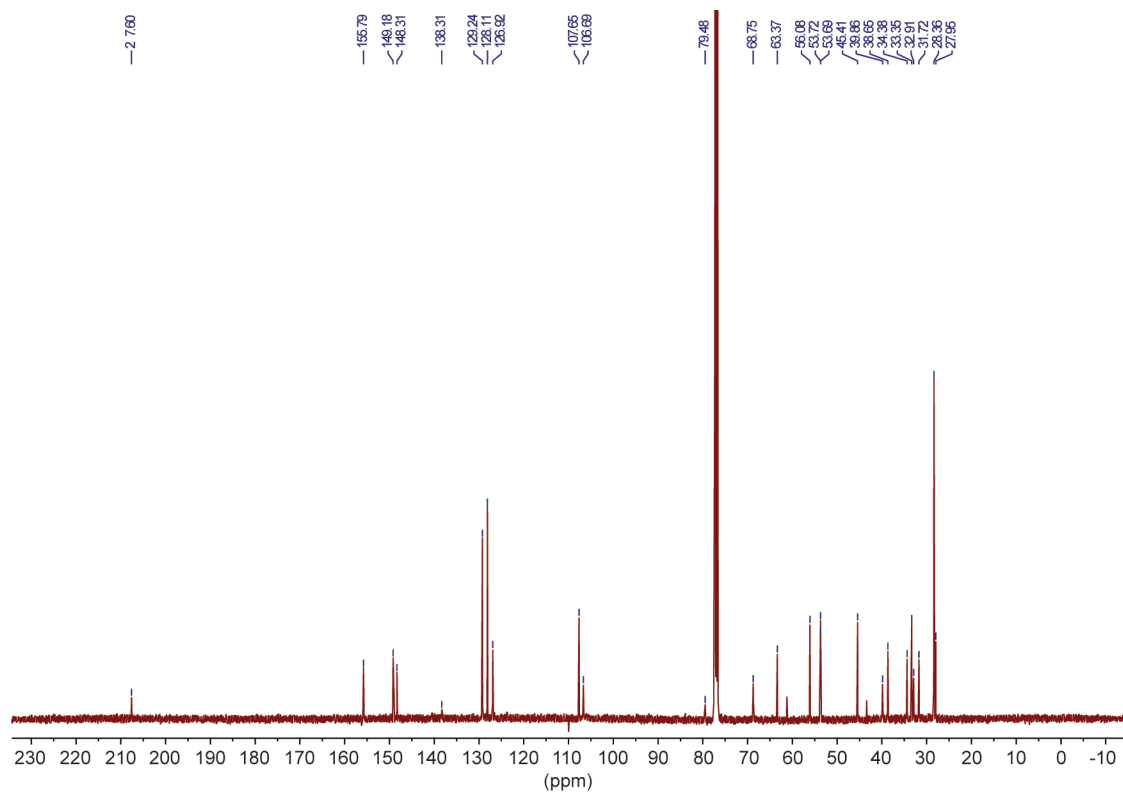

**Fig. S18:**  $^{13}\text{C}$  NMR spectrum for Boc-protected compound **8b** in  $\text{CDCl}_3$  (100 MHz).

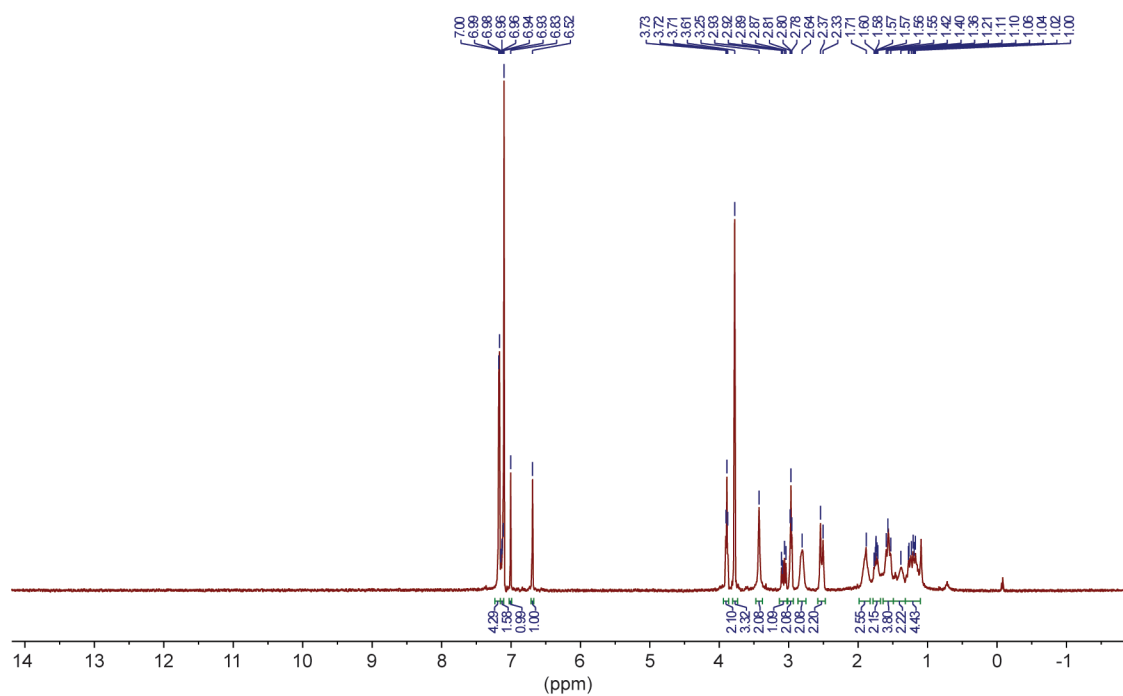

**Fig. S19:**  $^1\text{H}$  NMR spectrum for compound **8b** in  $\text{CDCl}_3$  (400 MHz).

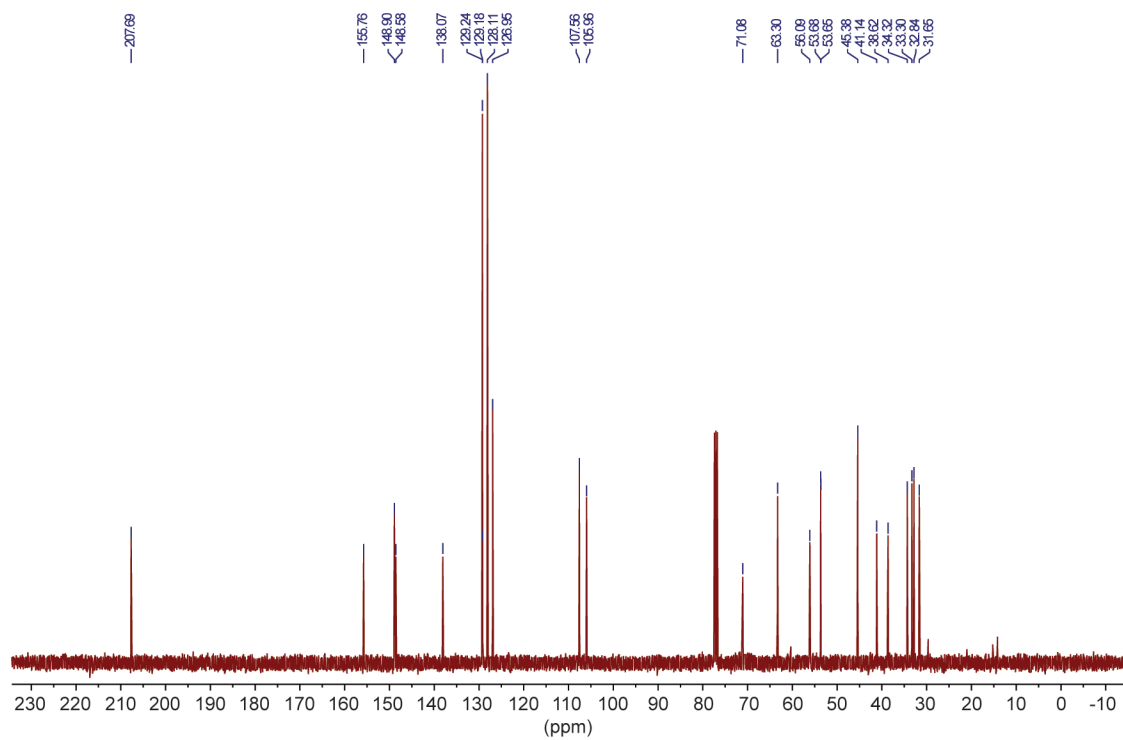

**Fig. S20:**  $^{13}\text{C}$  NMR spectrum for compound **8b** in  $\text{CDCl}_3$  (100 MHz).

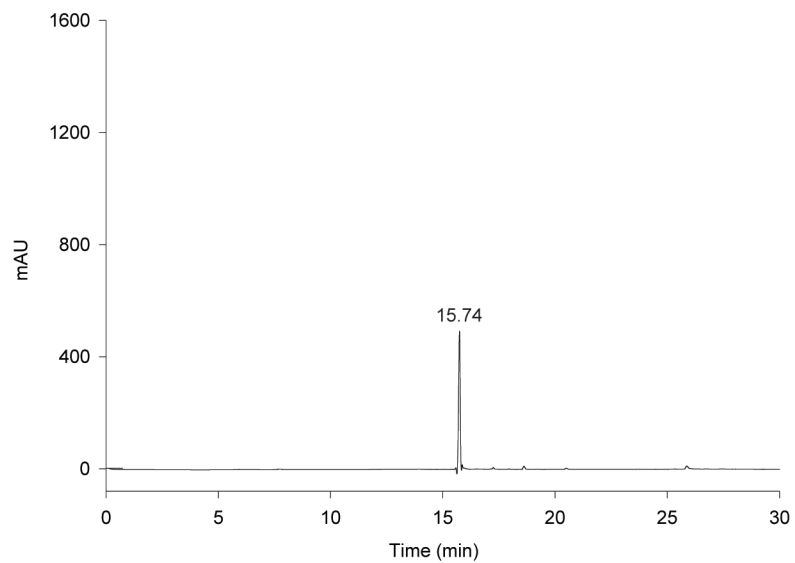

**Fig. S21:** HPLC trace for compound **8b**.  $R_t = 15.74$  min.

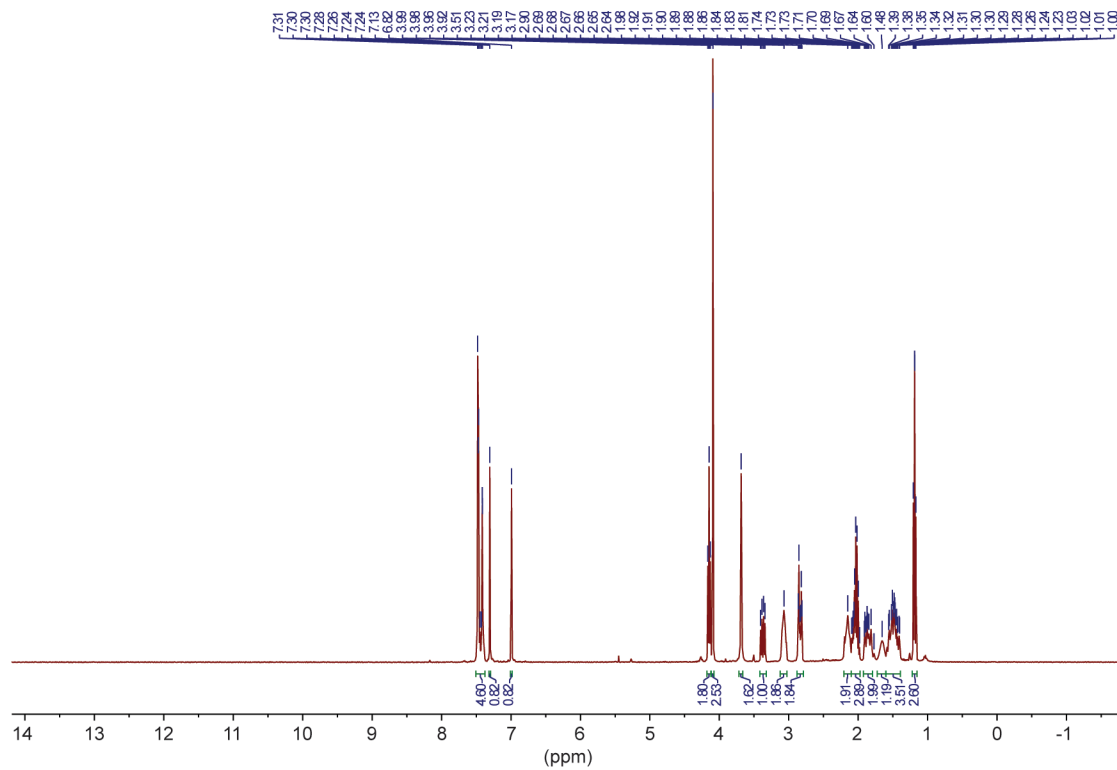

**Fig. S22:**  $^1\text{H}$  NMR spectrum for compound **8c** in  $\text{CDCl}_3$  (400 MHz).

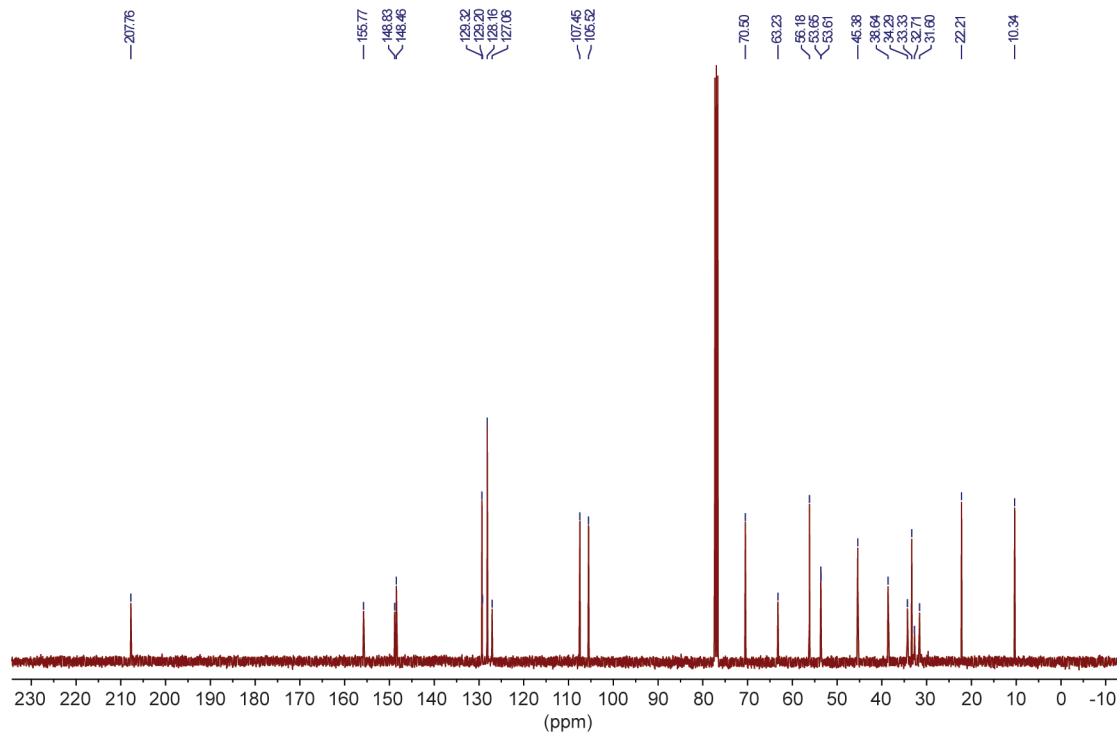

**Fig. S23:**  $^{13}\text{C}$  NMR spectrum for compound **8c** in  $\text{CDCl}_3$  (100 MHz).

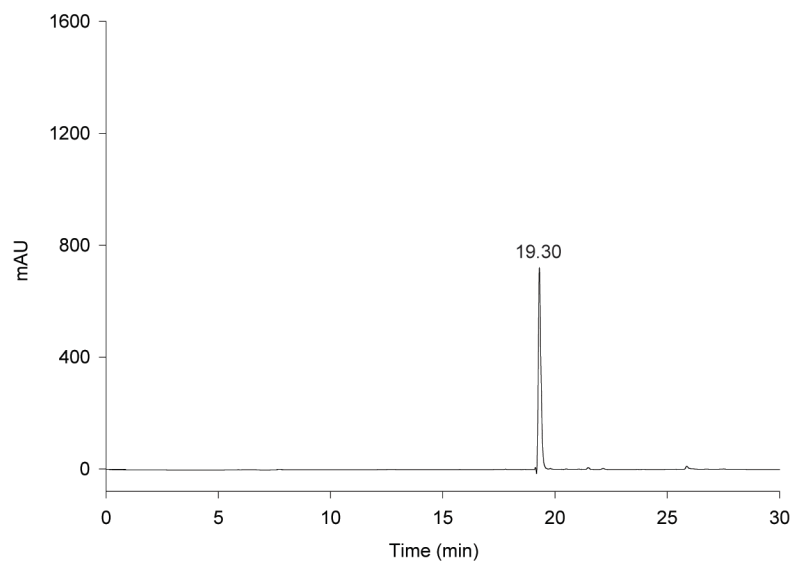

Fig. S24: HPLC trace for compound **8c**.  $R_t = 19.30$  min.

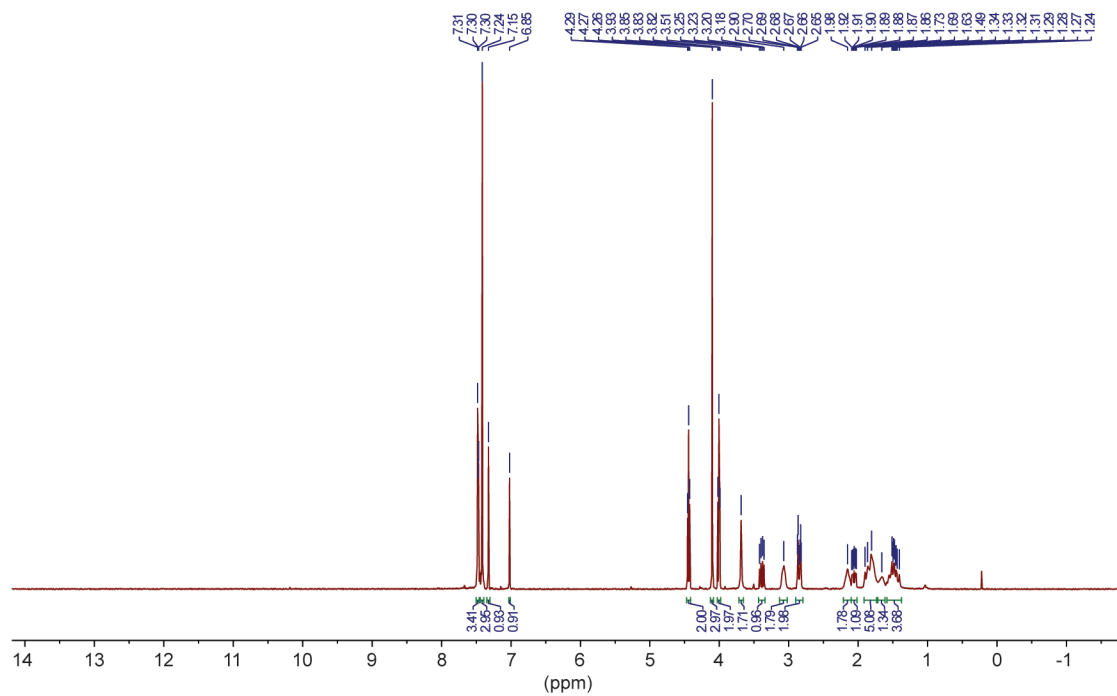

Fig. S25: <sup>1</sup>H NMR spectrum for compound **8d** in CDCl<sub>3</sub> (400 MHz).

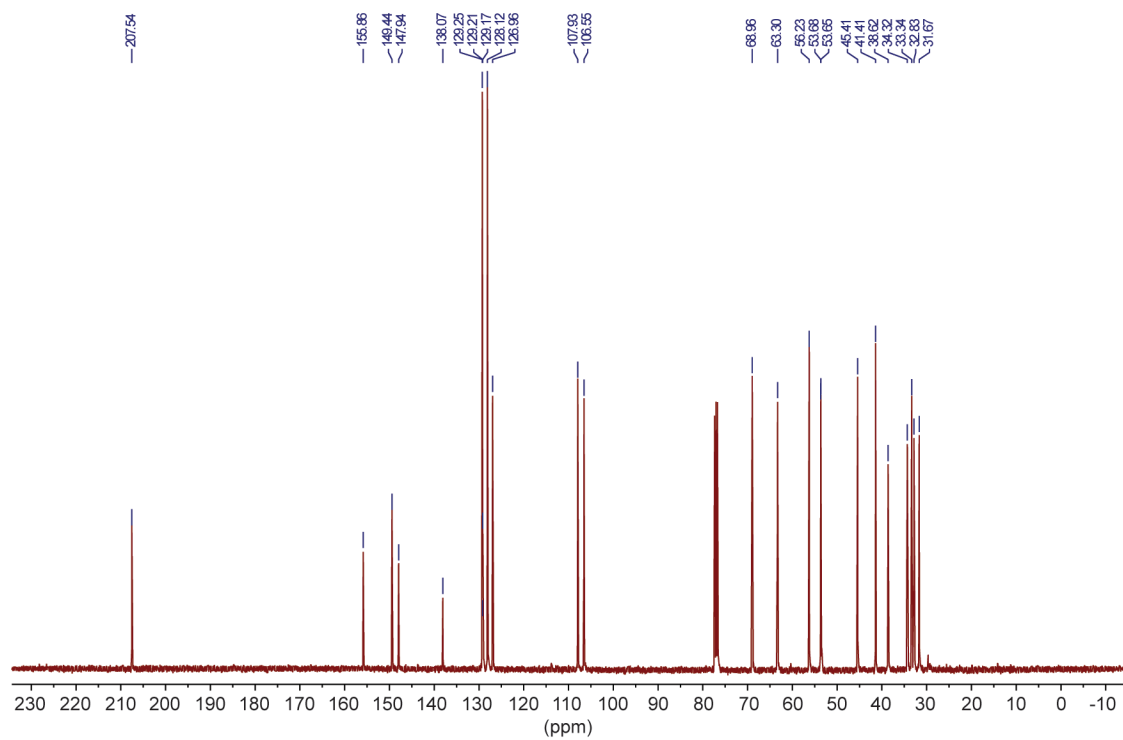

**Fig. S26:**  $^{13}\text{C}$  NMR spectrum for compound **8d** in  $\text{CDCl}_3$  (100 MHz).

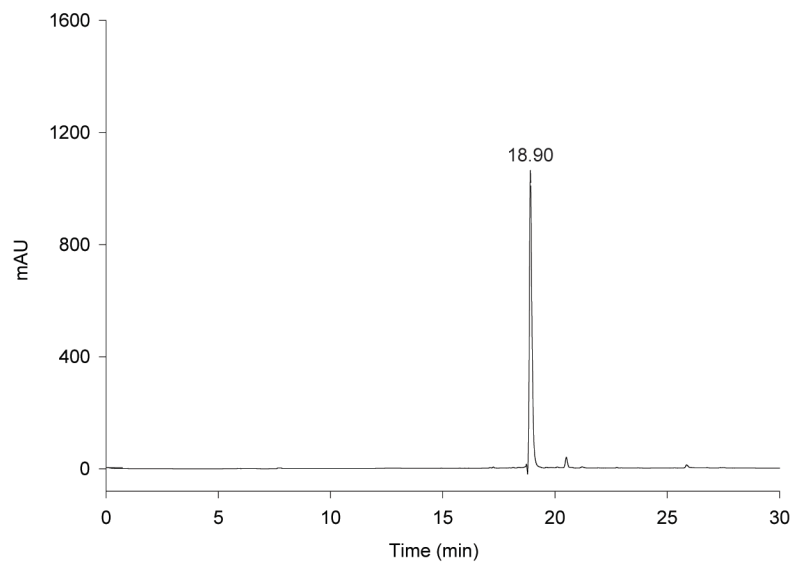

**Fig. S27:** HPLC trace for compound **8d**.  $R_t = 18.90$  min.

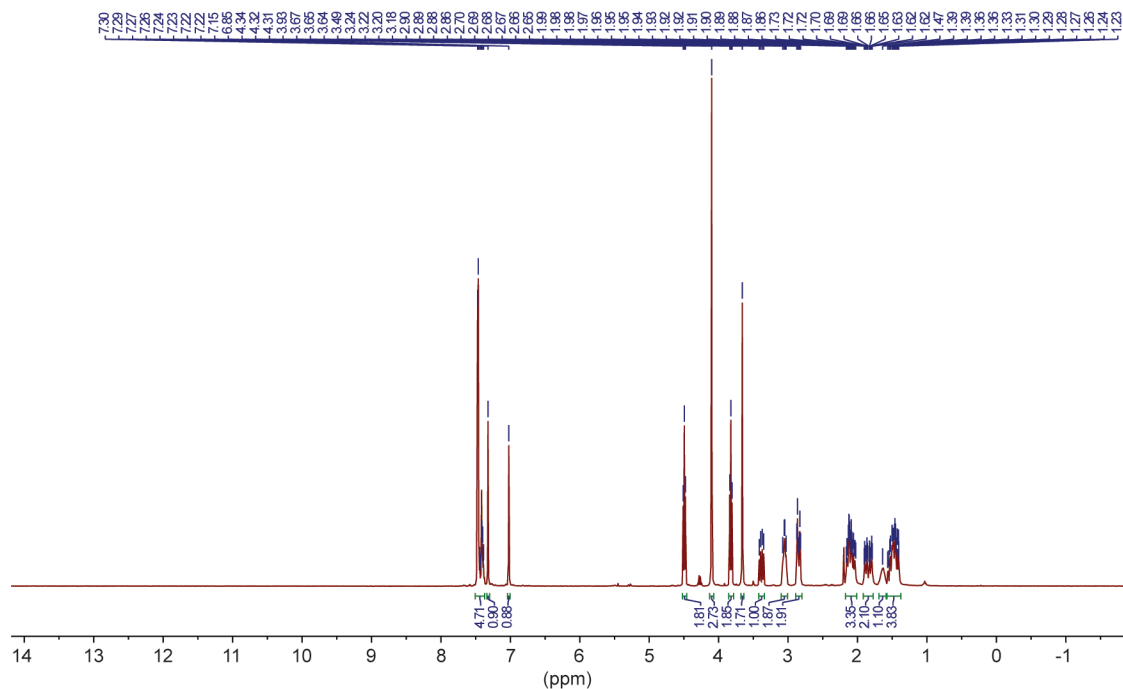

Fig. S28:  $^1\text{H}$  NMR spectrum for compound **8e** in  $\text{CDCl}_3$  (400 MHz).

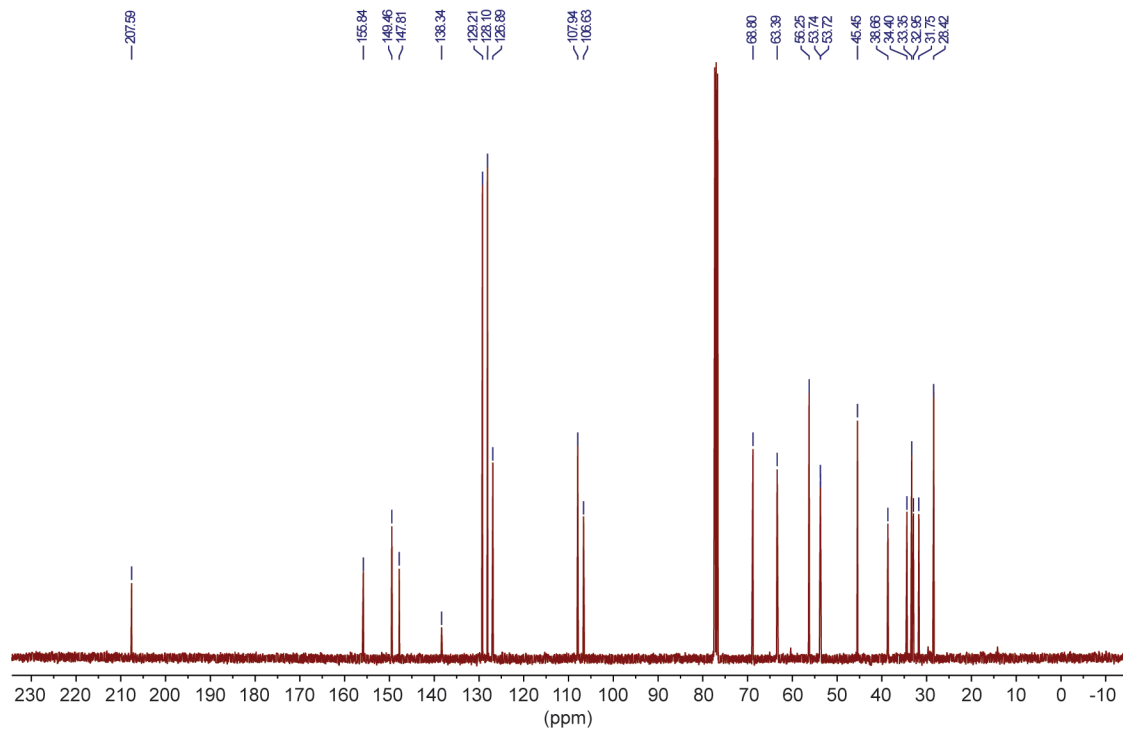

Fig. S29:  $^{13}\text{C}$  NMR spectrum for compound **8e** in  $\text{CDCl}_3$  (100 MHz).

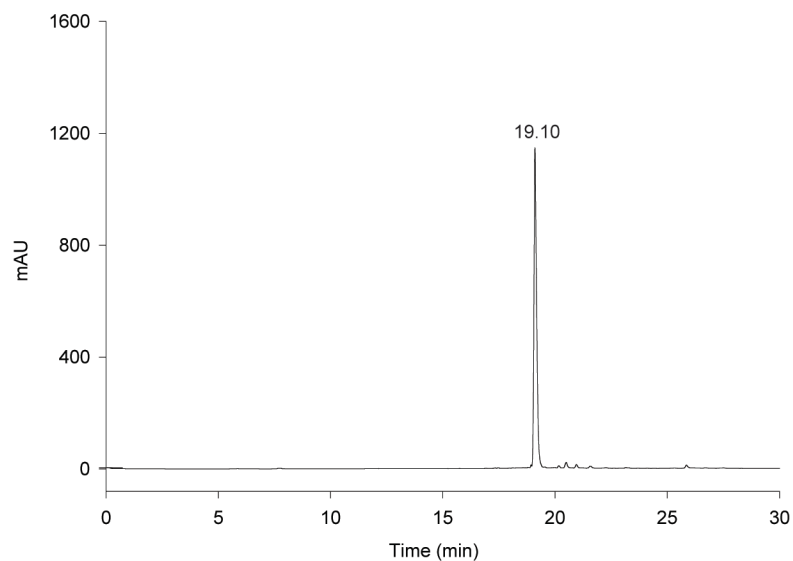

Fig. S30: HPLC trace for compound **8e**.  $R_t = 19.10$  min.

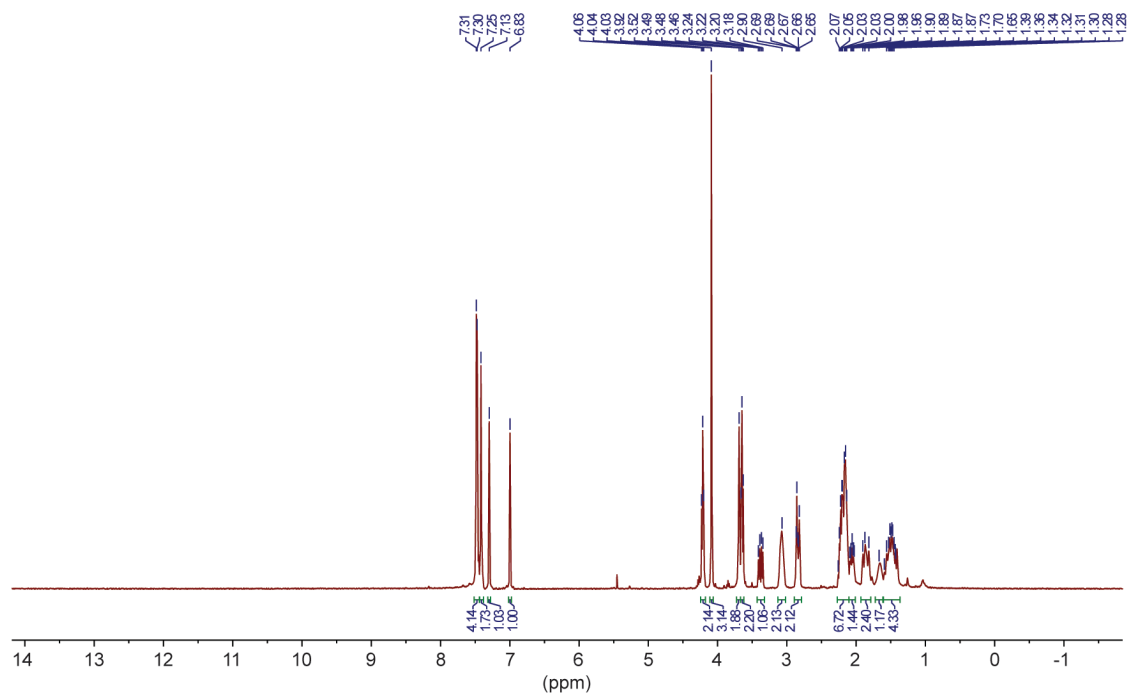

Fig. S31:  $^1\text{H}$  NMR spectrum for compound **8f** in  $\text{CDCl}_3$  (400 MHz).



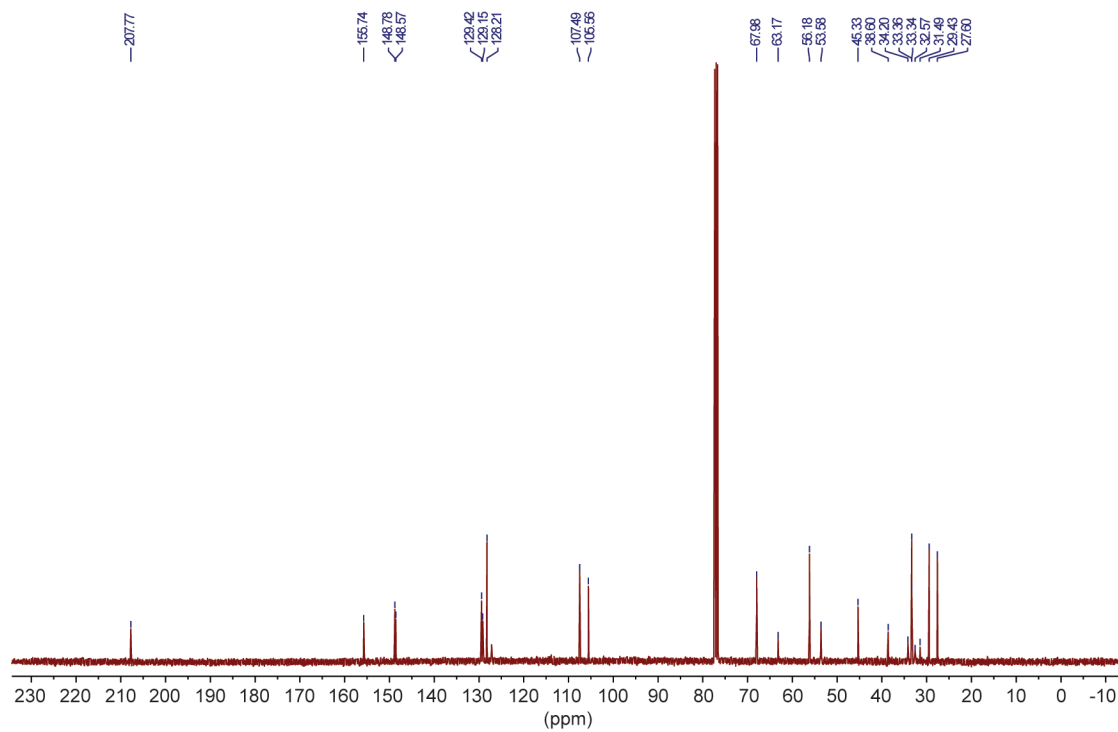

**Fig. S32:**  $^{13}\text{C}$  NMR spectrum for compound **8f** in  $\text{CDCl}_3$  (100 MHz).

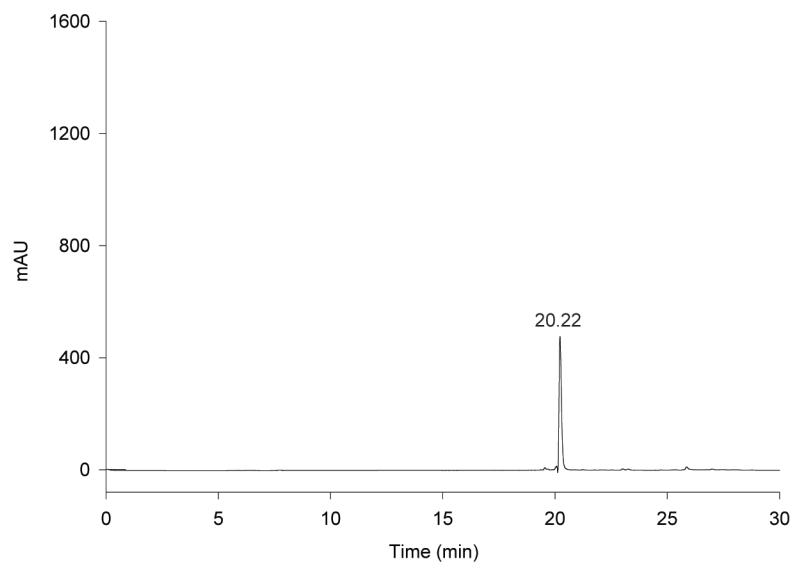

**Fig. S33:** HPLC trace for compound **8f**.  $R_t = 20.22$  min.

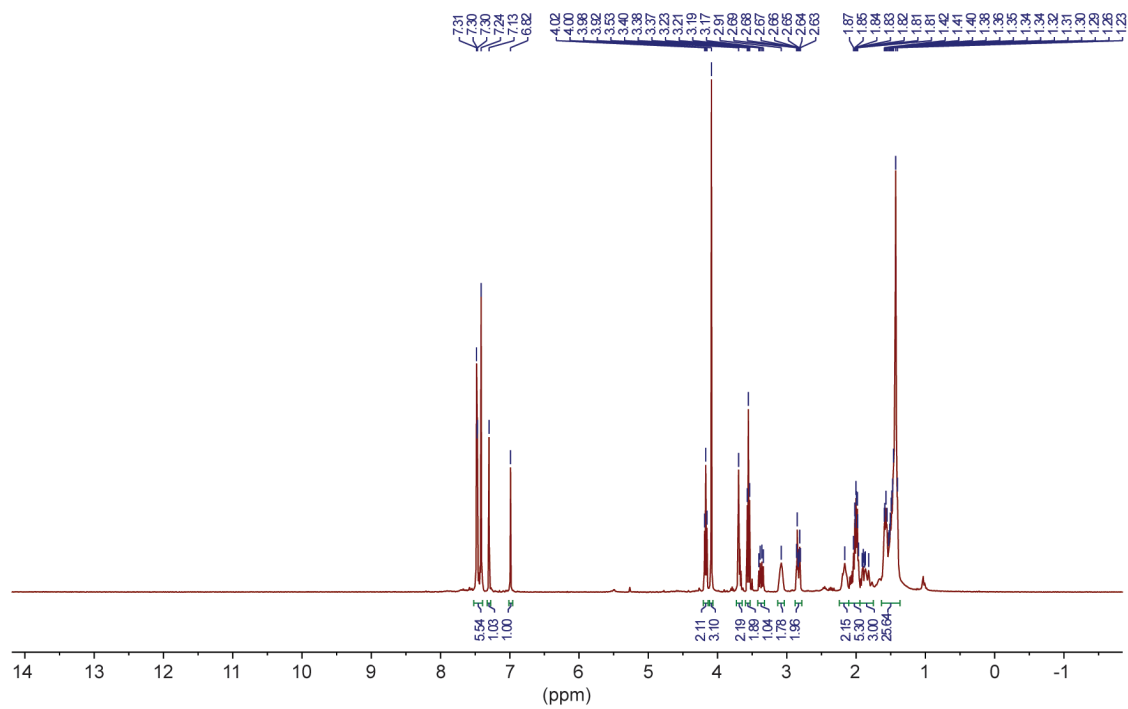

**Fig. S34:**  $^1\text{H}$  NMR spectrum for compound **8g** in  $\text{CDCl}_3$  (400 MHz).

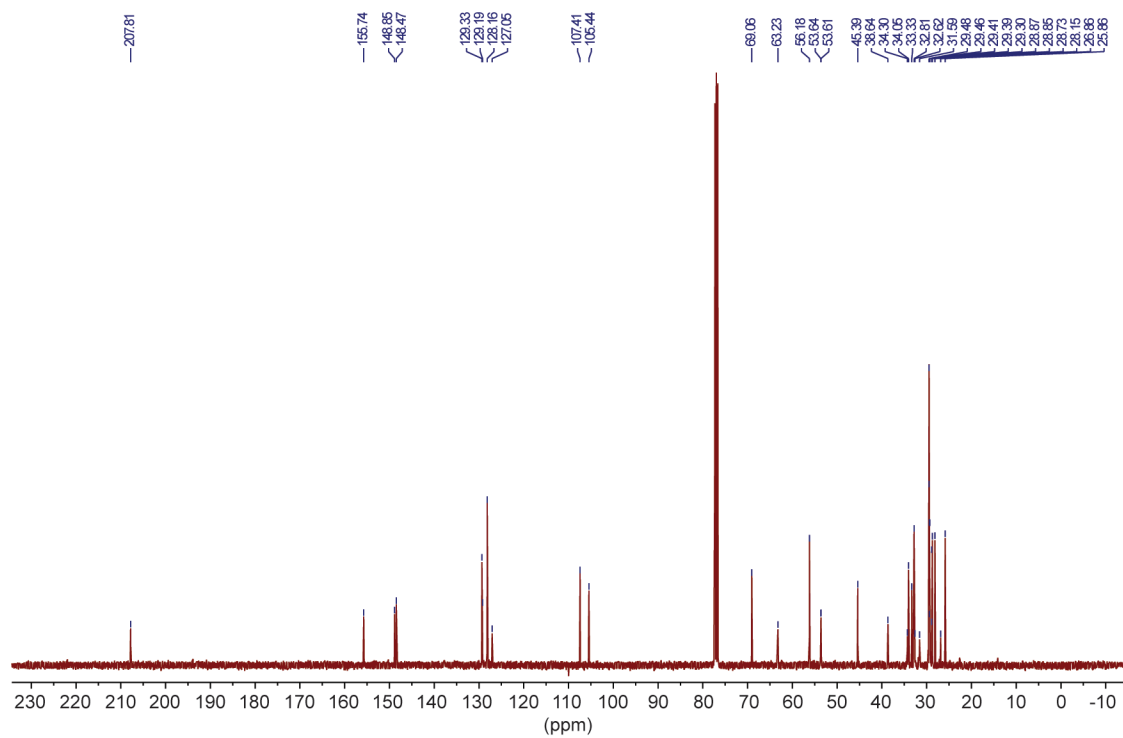

**Fig. S35:**  $^{13}\text{C}$  NMR spectrum for compound **8g** in  $\text{CDCl}_3$  (100 MHz).

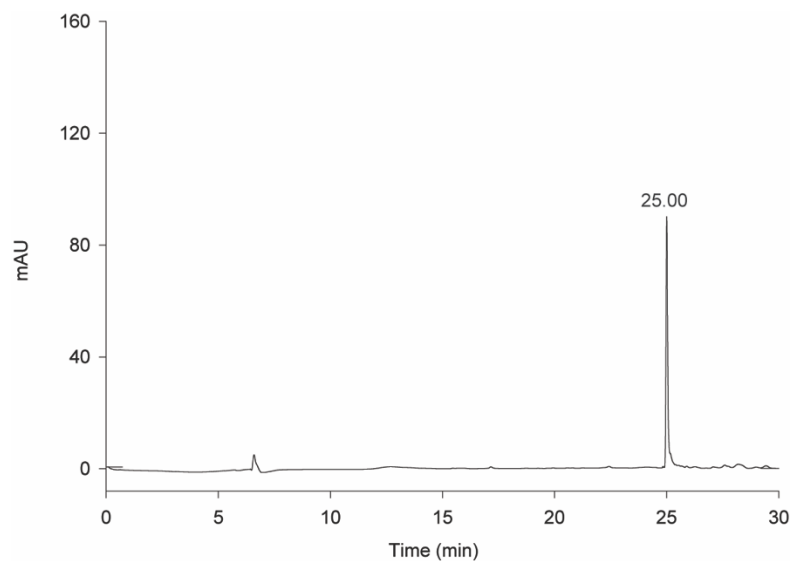

Fig. S36: HPLC trace for compound **8g**,  $R_t = 25.00$  min.

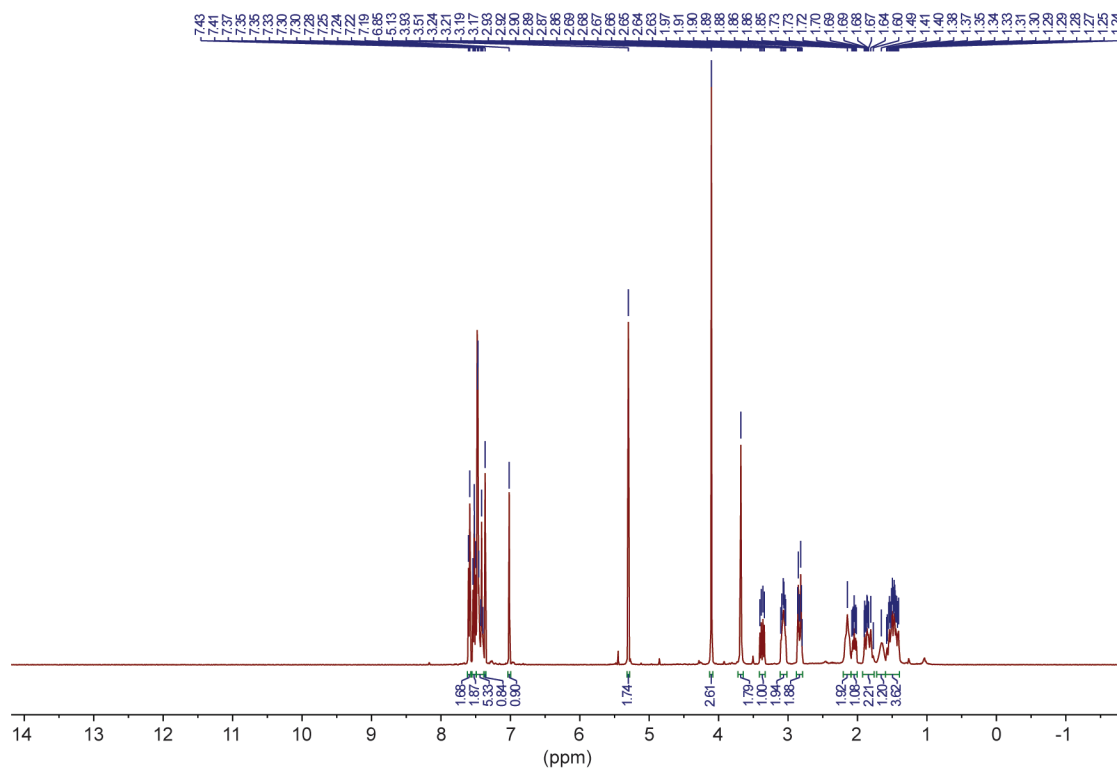

Fig. S37: <sup>1</sup>H NMR spectrum for compound **8h** in CDCl<sub>3</sub> (400 MHz).

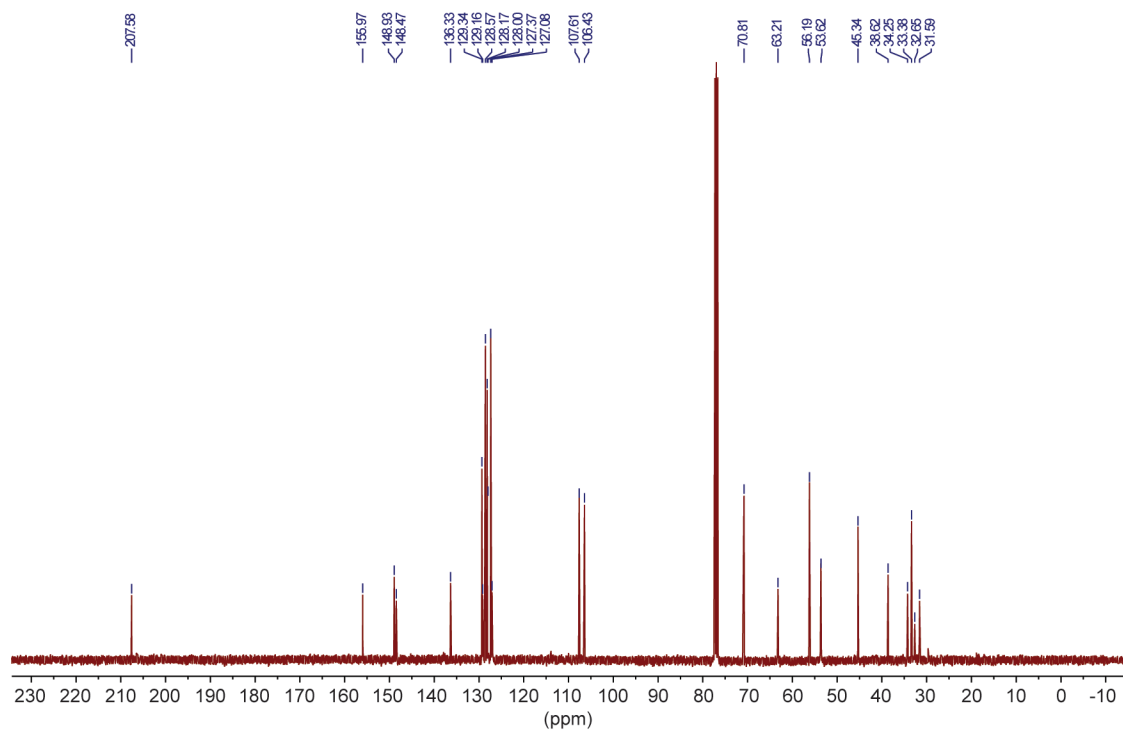

**Fig. S38:**  $^{13}\text{C}$  NMR spectrum for compound **8h** in  $\text{CDCl}_3$  (100 MHz).

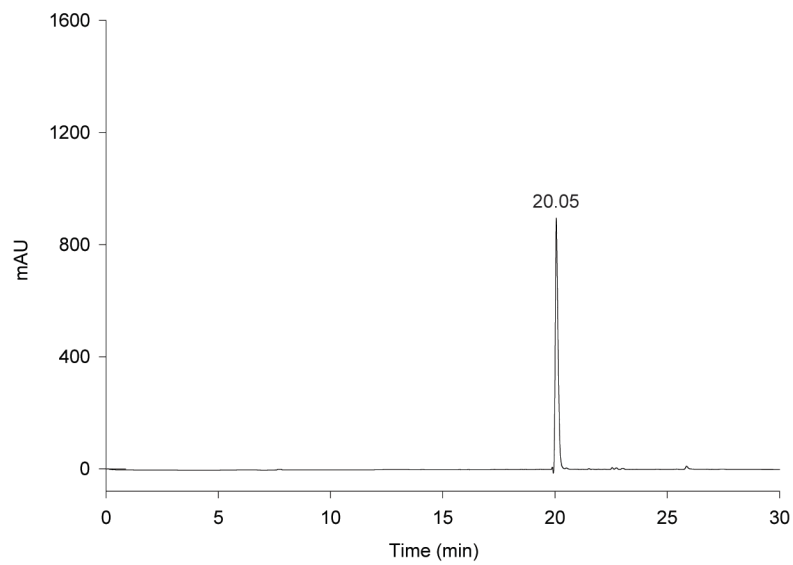

**Fig. S39:** HPLC trace for compound **8h**.  $R_t = 20.05$  min.

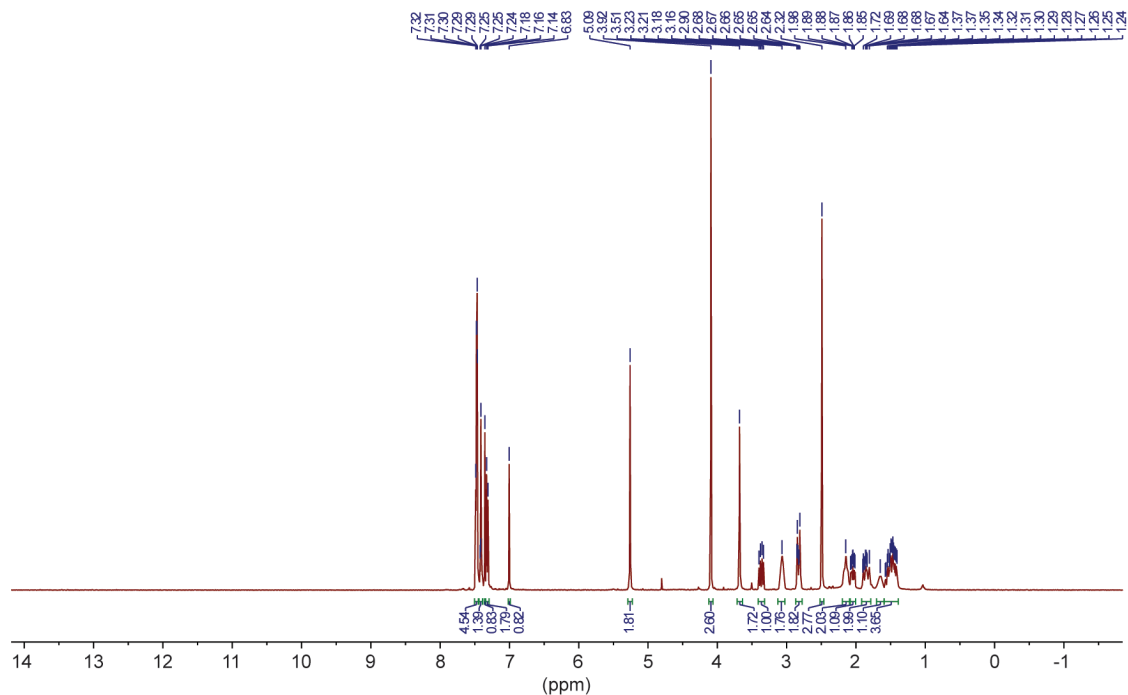

**Fig. S40:**  $^1\text{H}$  NMR spectrum for compound **8i** in  $\text{CDCl}_3$  (400 MHz).

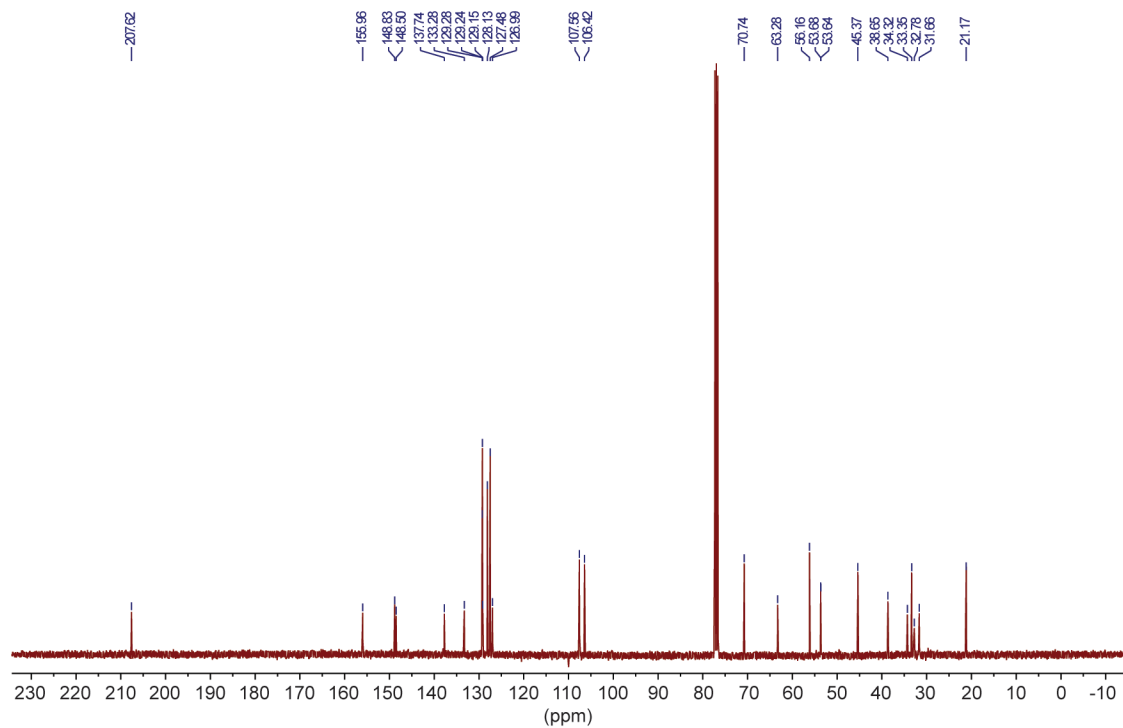

**Fig. S41:**  $^{13}\text{C}$  NMR spectrum for compound **8i** in  $\text{CDCl}_3$  (100 MHz).

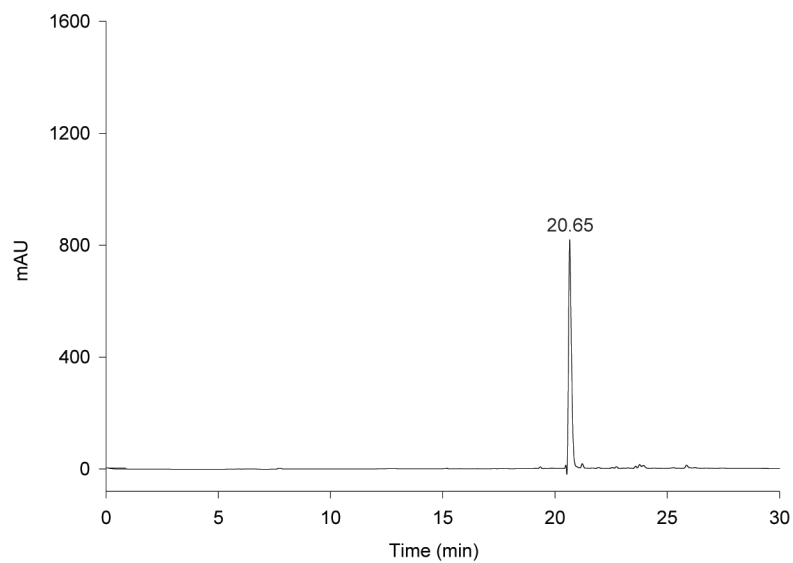

Fig. S42: HPLC trace for compound **8i**.  $R_t = 20.65$  min.

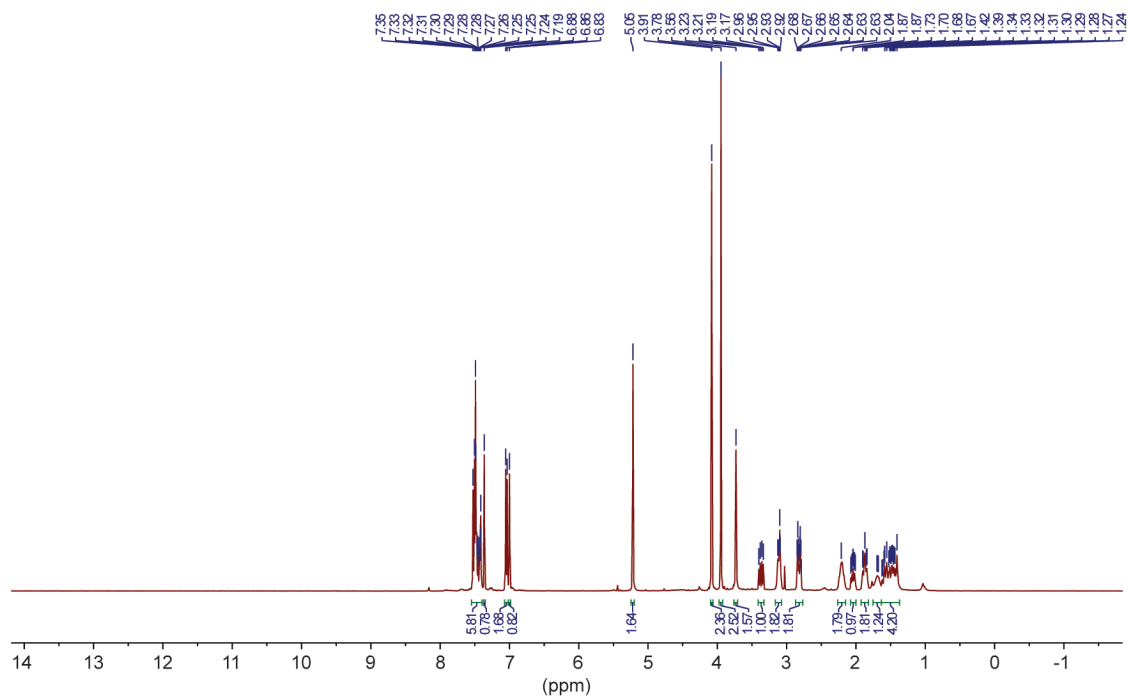

Fig. S43: <sup>1</sup>H NMR spectrum for compound **8j** in CDCl<sub>3</sub> (400 MHz).

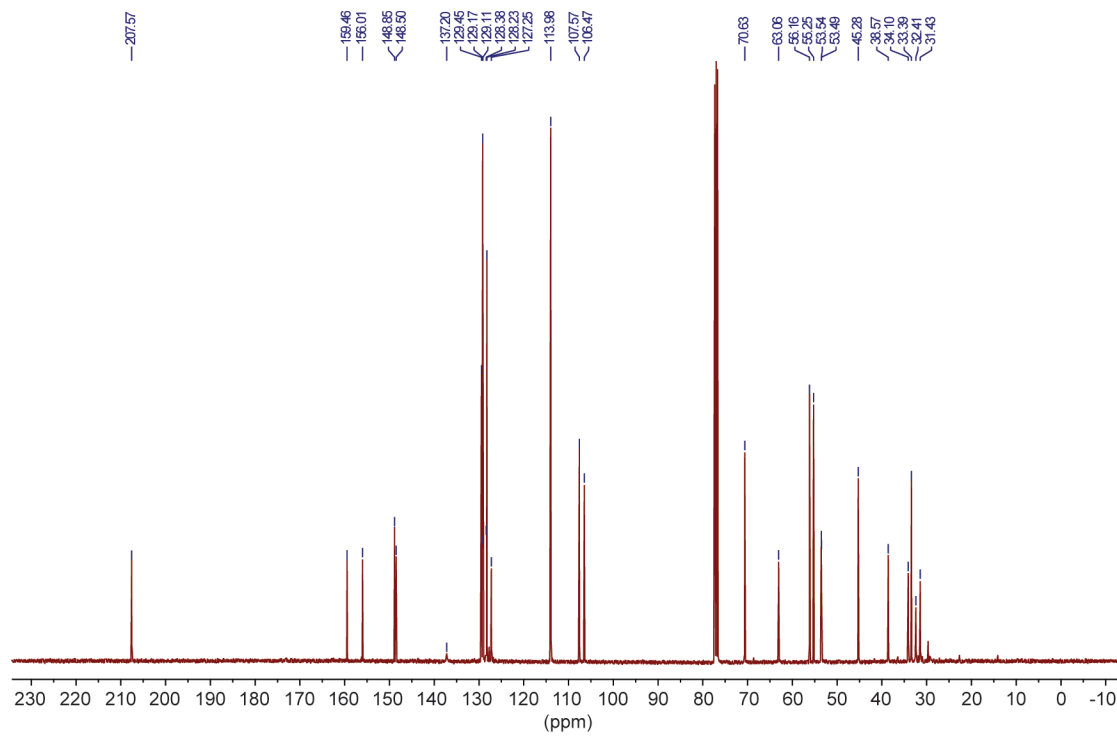

Fig. S44:  $^{13}\text{C}$  NMR spectrum for compound **8j** in  $\text{CDCl}_3$  (100 MHz).

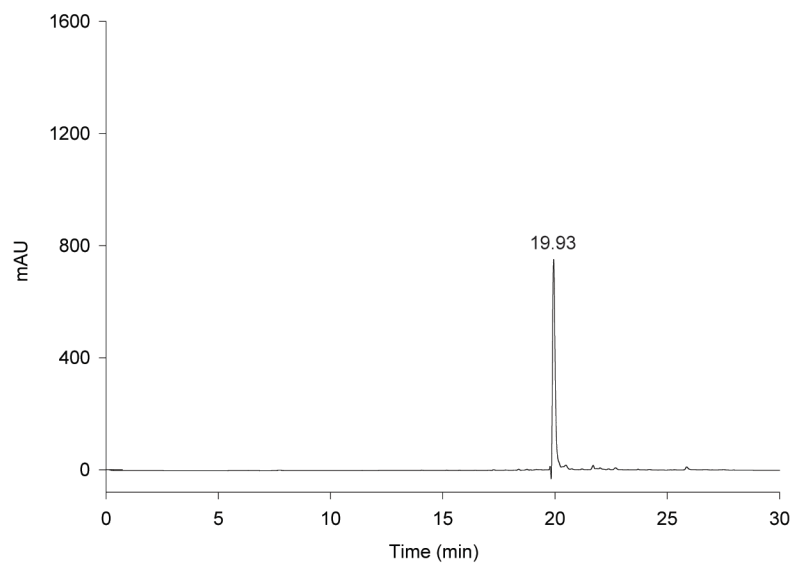

Fig. S45: HPLC trace for compound **8j**.  $R_t = 19.93$  min.

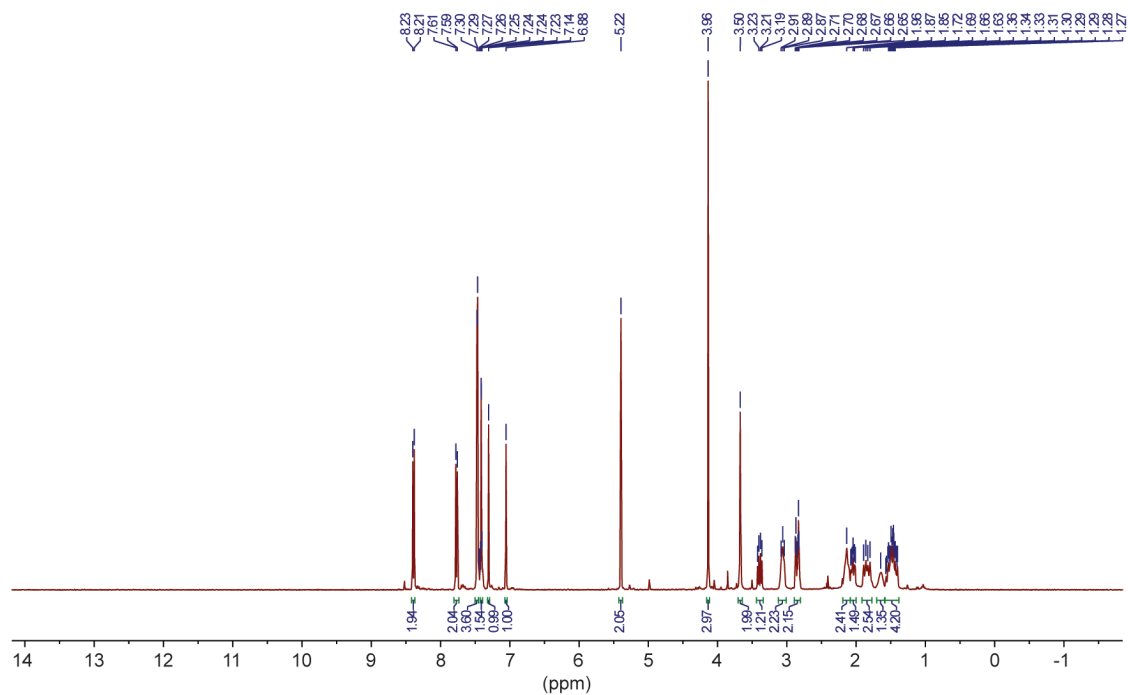

Fig. S46:  $^1\text{H}$  NMR spectrum for compound **8k** in  $\text{CDCl}_3$  (400 MHz).

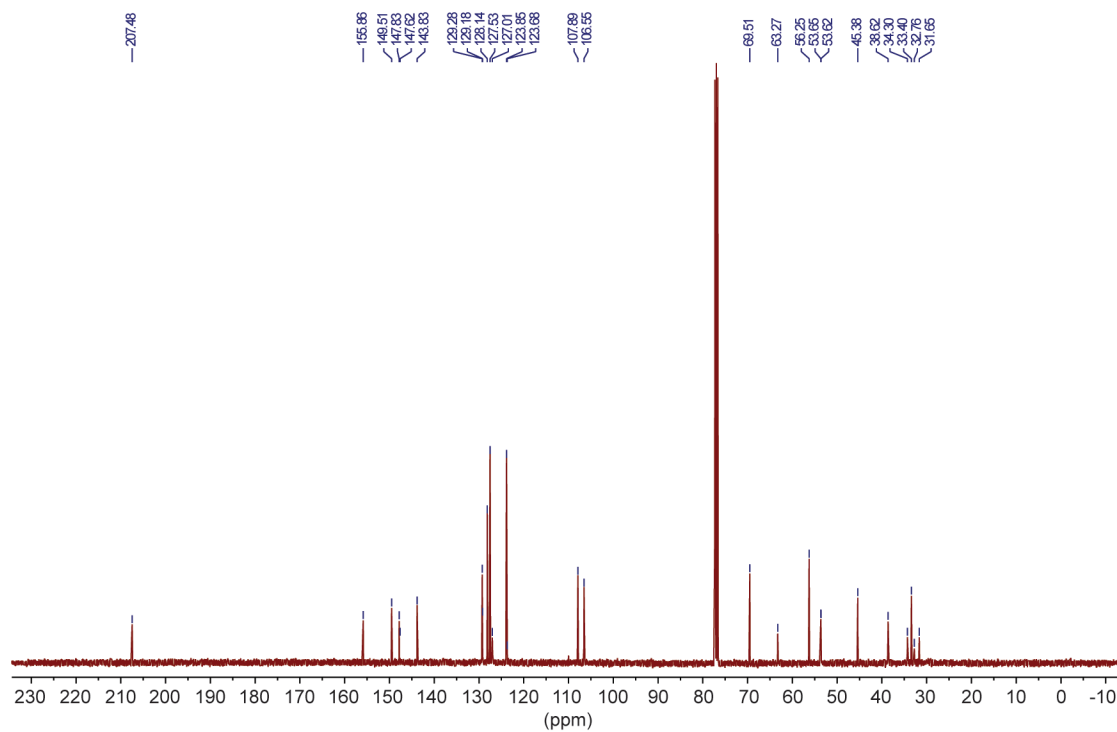

Fig. S47:  $^{13}\text{C}$  NMR spectrum for compound **8k** in  $\text{CDCl}_3$  (100 MHz).



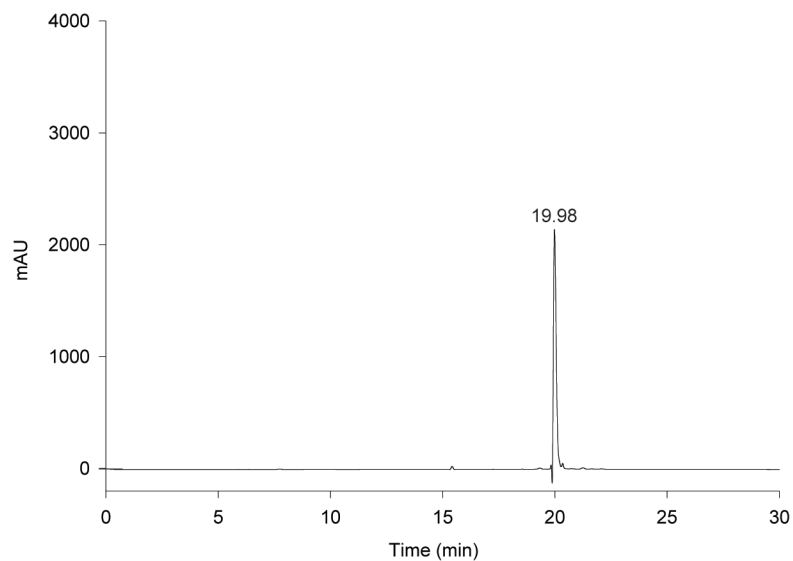

Fig. S48: HPLC trace for compound **8k**.  $R_t = 19.98$  min.

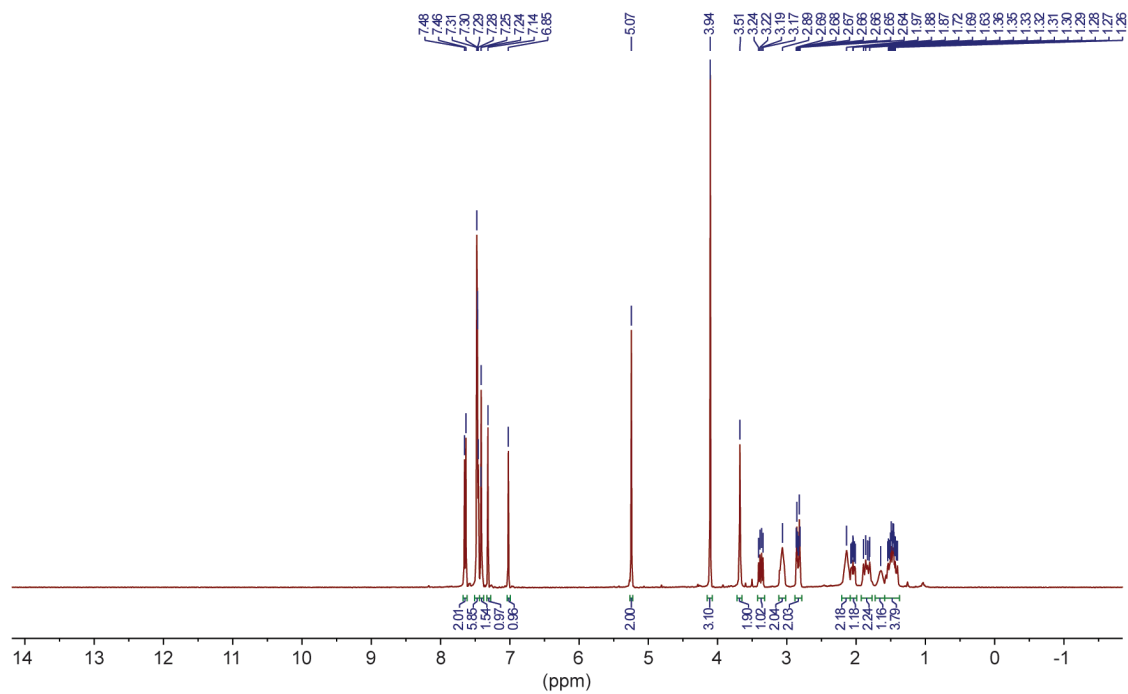

Fig. S49: <sup>1</sup>H NMR spectrum for compound **8l** in CDCl<sub>3</sub> (400 MHz).

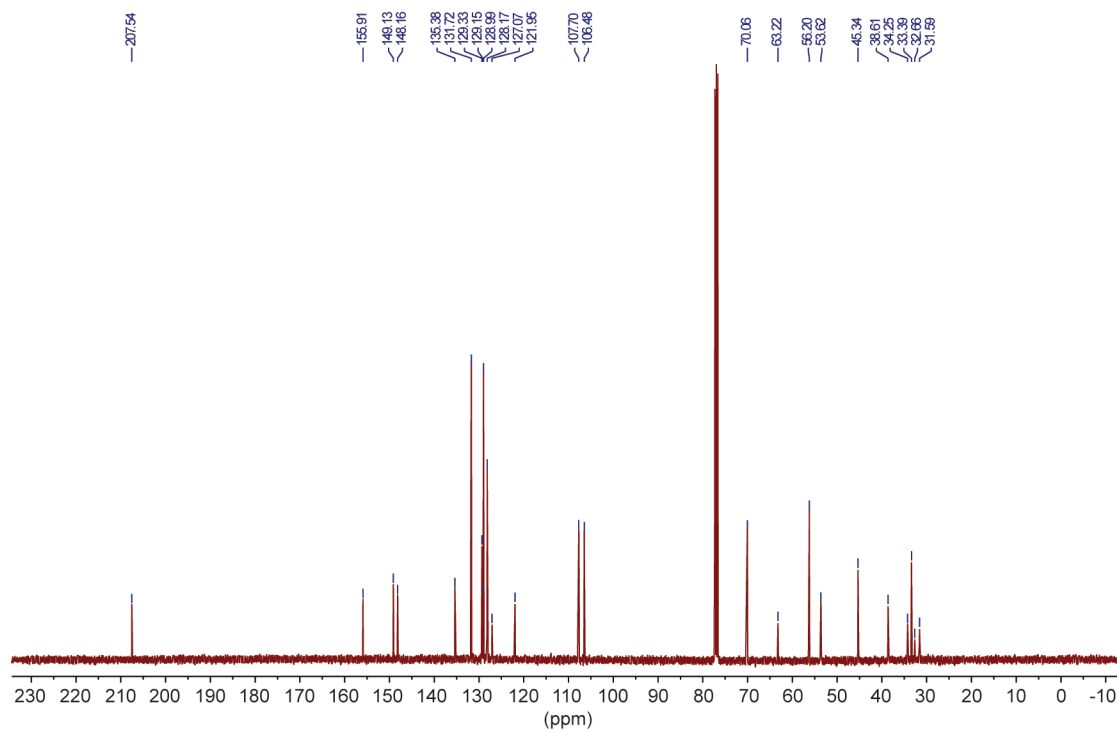

**Fig. S50:**  $^{13}\text{C}$  NMR spectrum for compound **8l** in  $\text{CDCl}_3$  (100 MHz).

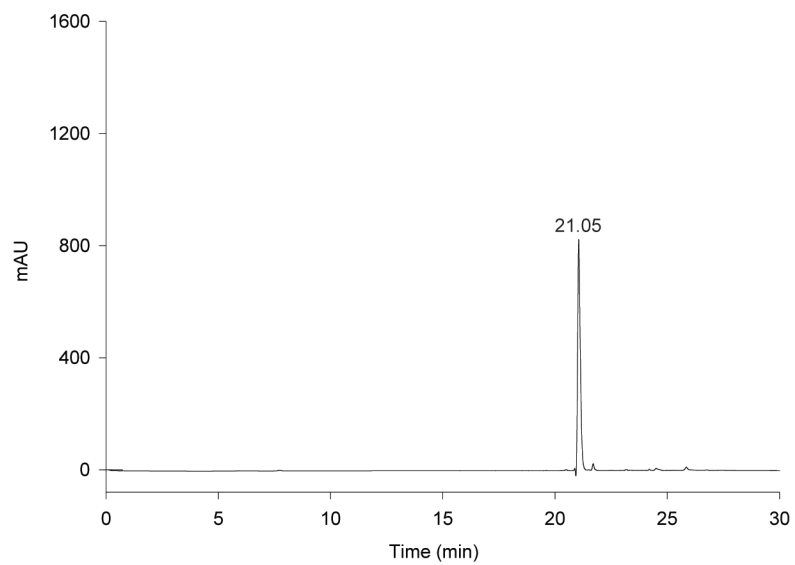

**Fig. S51:** HPLC trace for compound **8l**.  $R_t = 21.05$  min.

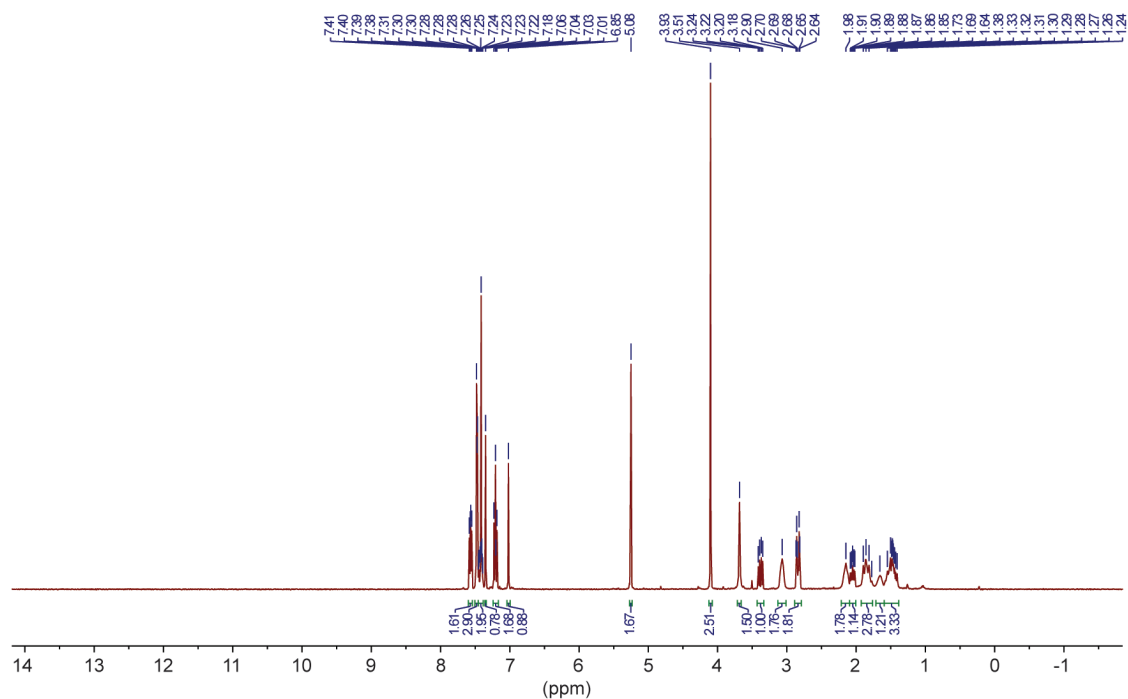

Fig. S52:  $^1\text{H}$  NMR spectrum for compound **8m** in  $\text{CDCl}_3$  (400 MHz).

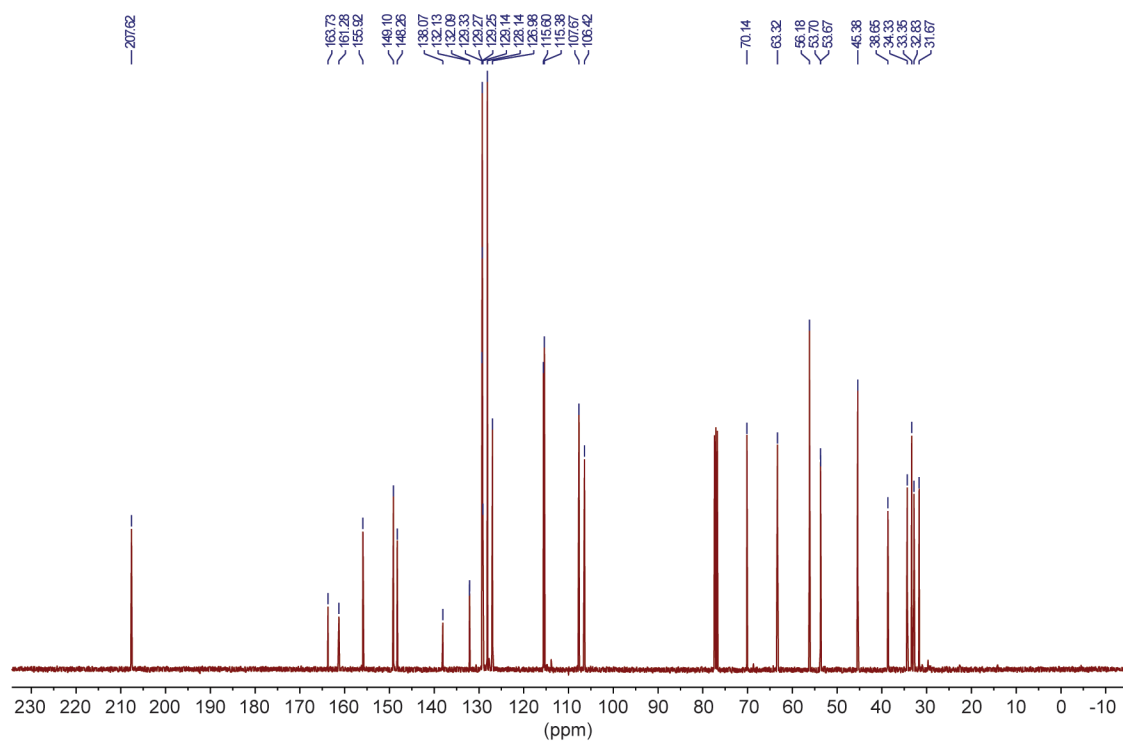

Fig. S53:  $^{13}\text{C}$  NMR spectrum for compound **8m** in  $\text{CDCl}_3$  (100 MHz).

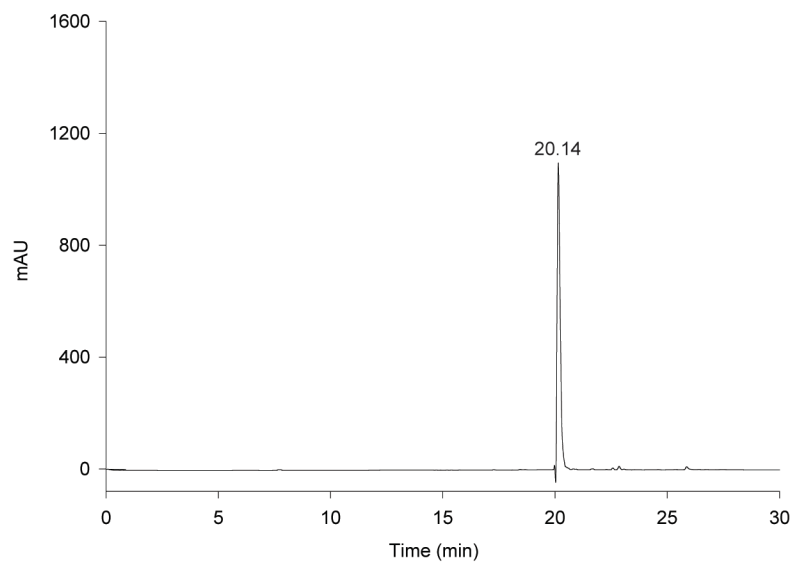

Fig. S54: HPLC trace for compound **8m**.  $R_t = 20.14$  min.

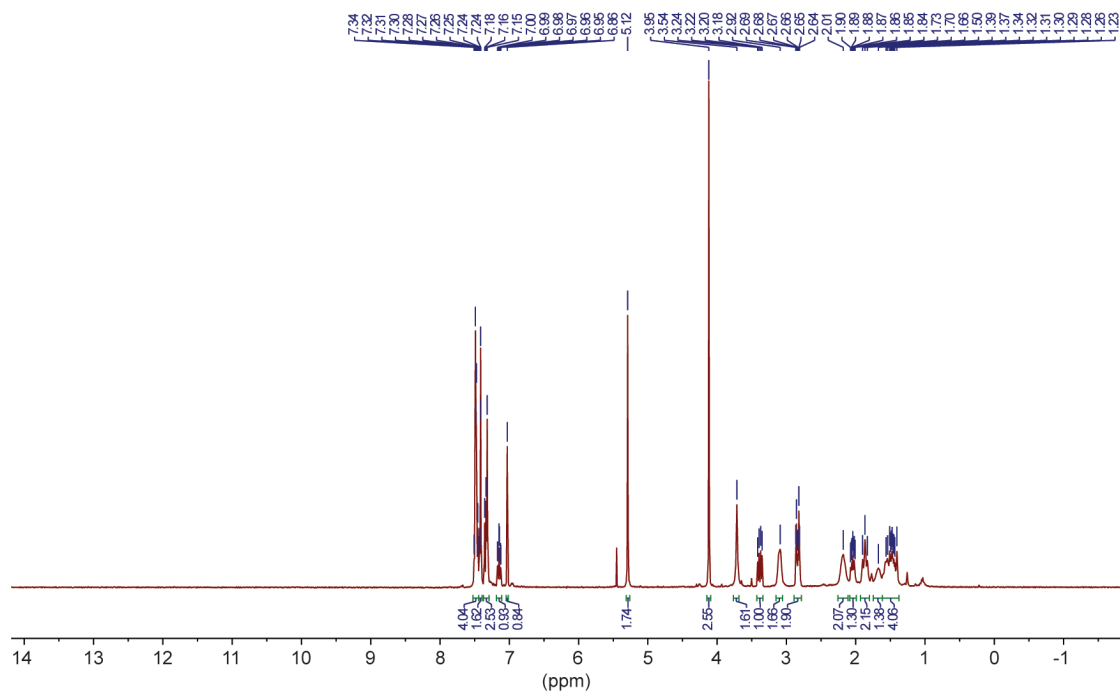

Fig. S55: <sup>1</sup>H NMR spectrum for compound **8n** in CDCl<sub>3</sub> (400 MHz).

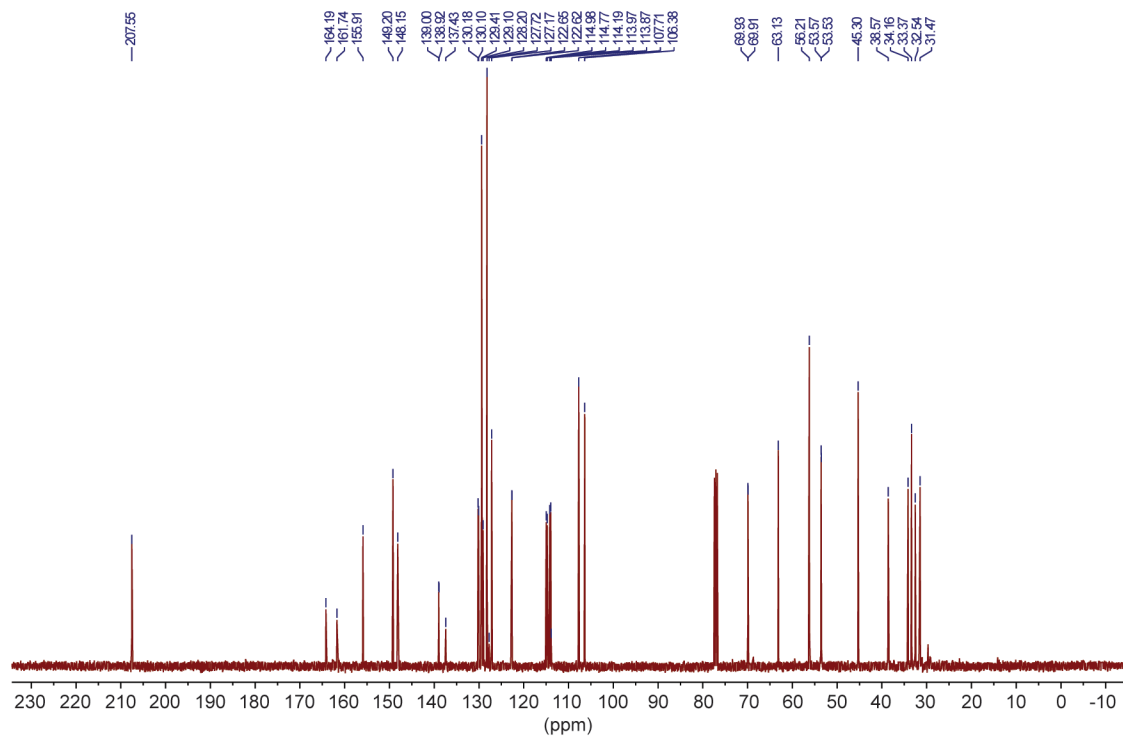

**Fig. S56:**  $^{13}\text{C}$  NMR spectrum for compound **8n** in  $\text{CDCl}_3$  (100 MHz).

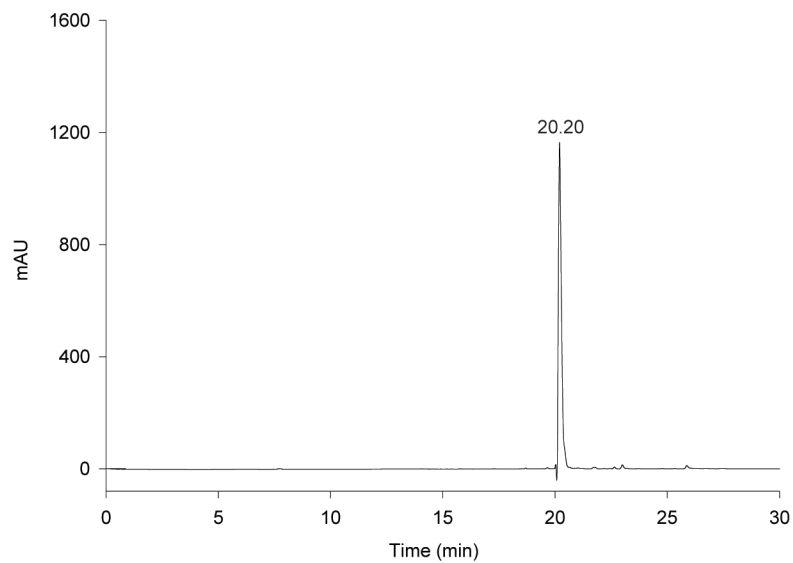

**Fig. S57:** HPLC trace for compound **8n**.  $R_t = 20.20$  min.

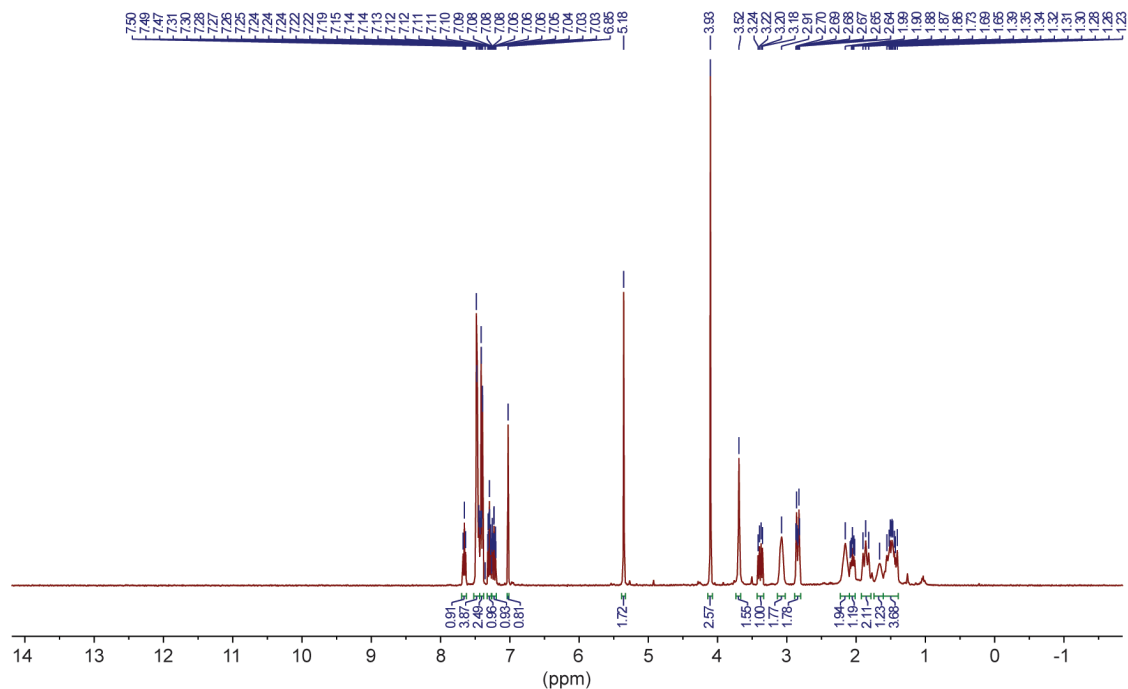

Fig. S58:  $^1\text{H}$  NMR spectrum for compound **8o** in  $\text{CDCl}_3$  (400 MHz).

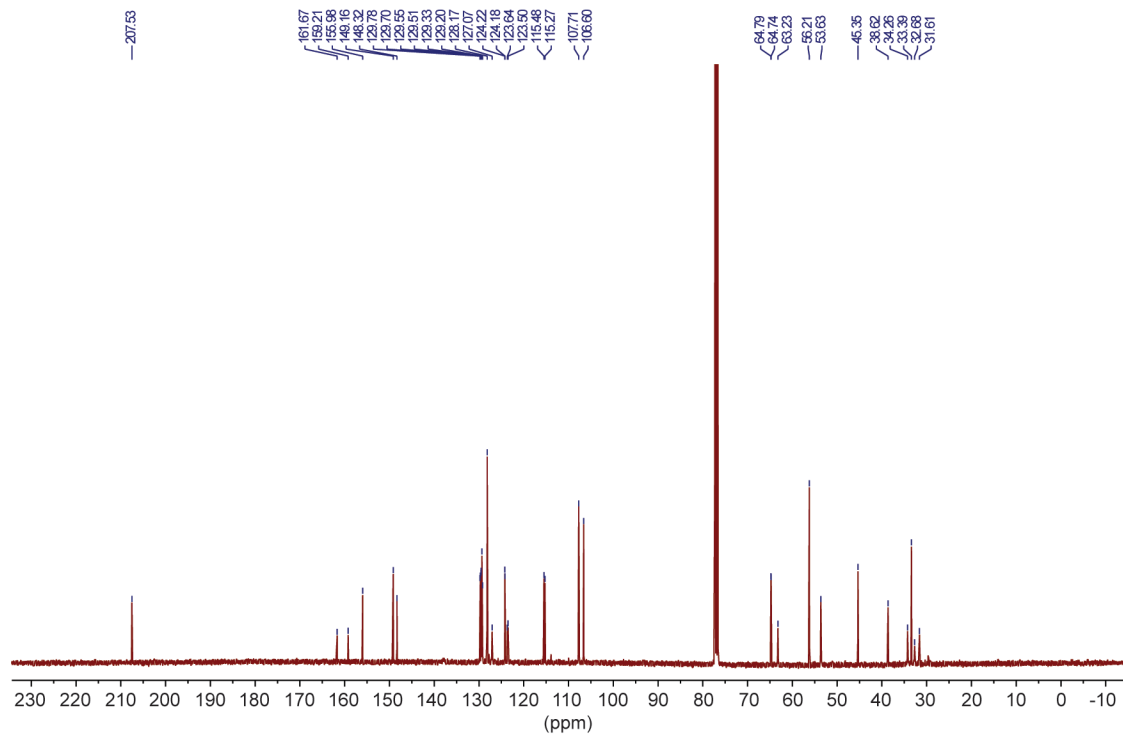

Fig. S59:  $^{13}\text{C}$  NMR spectrum for compound **8o** in  $\text{CDCl}_3$  (100 MHz).

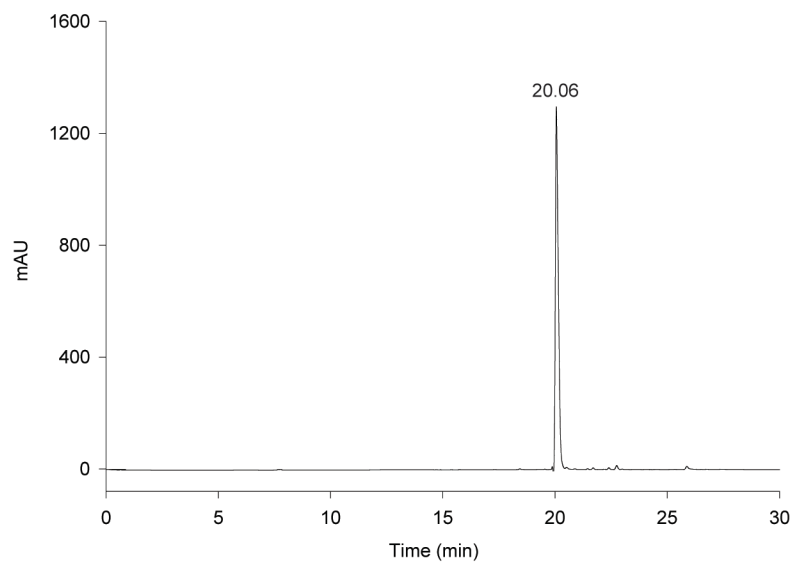

Fig. S60: HPLC trace for compound **8o**.  $R_t = 20.06$  min.

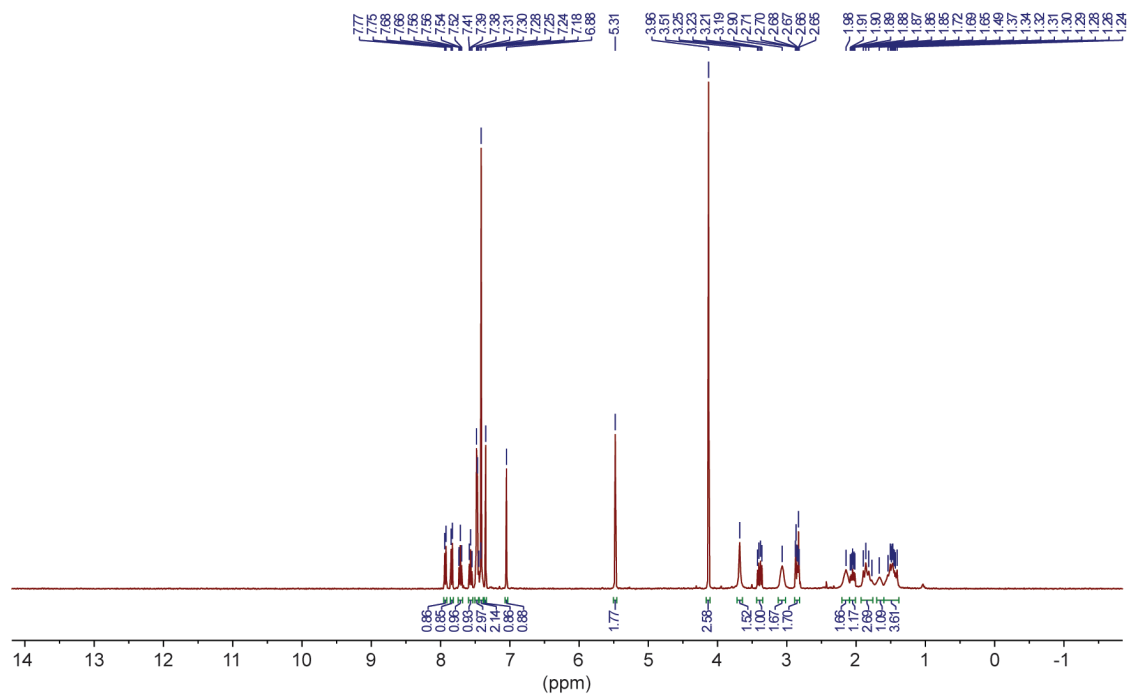

Fig. S61: <sup>1</sup>H NMR spectrum for compound **8p** in CDCl<sub>3</sub> (400 MHz).

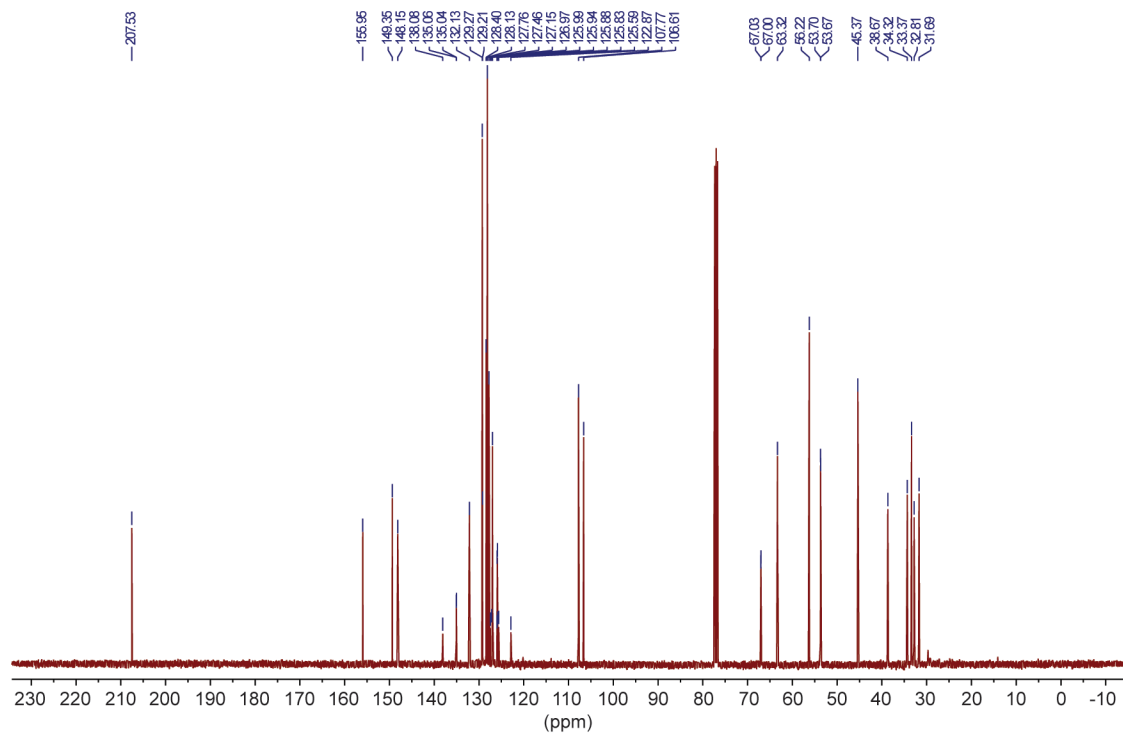

**Fig. S62:**  $^{13}\text{C}$  NMR spectrum for compound **8p** in  $\text{CDCl}_3$  (100 MHz).

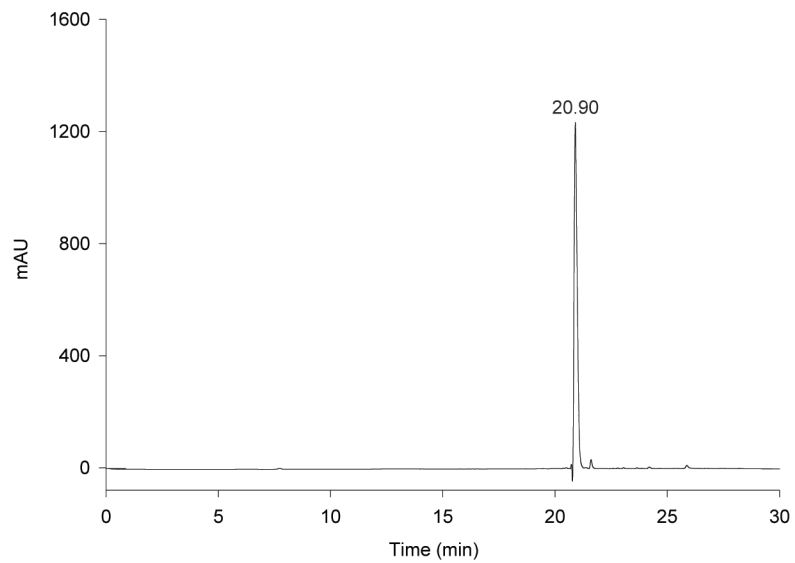

**Fig. S63:** HPLC trace for compound **8p**.  $R_t = 20.90$  min.



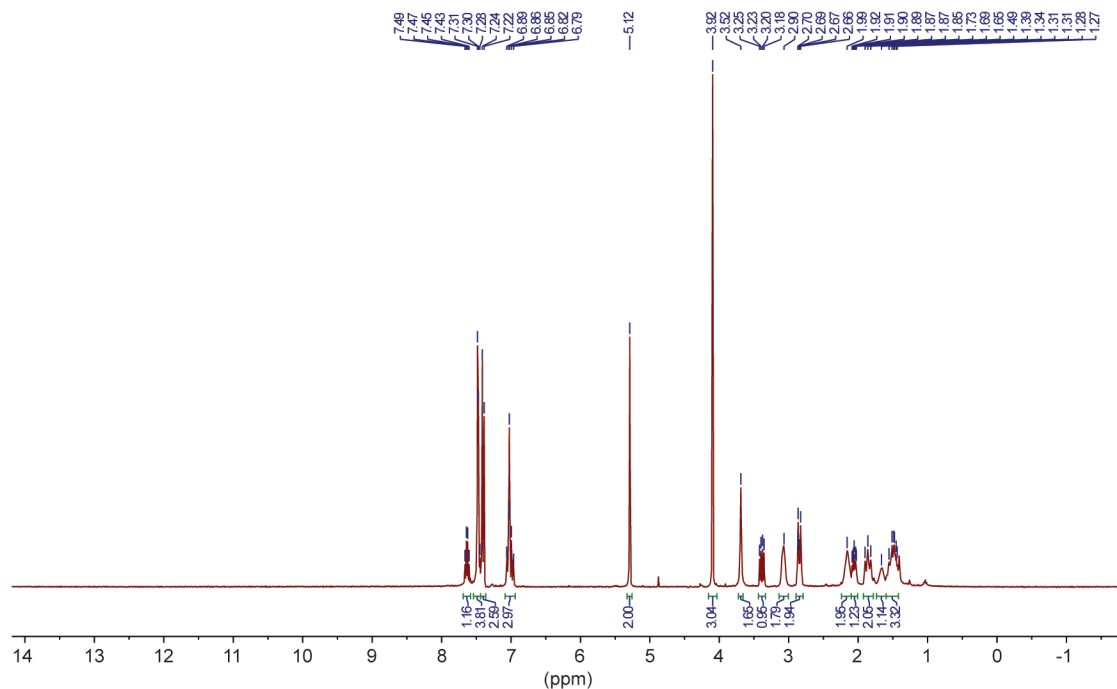

Fig. S64:  $^1\text{H}$  NMR spectrum for compound **8q** in  $\text{CDCl}_3$  (400 MHz).

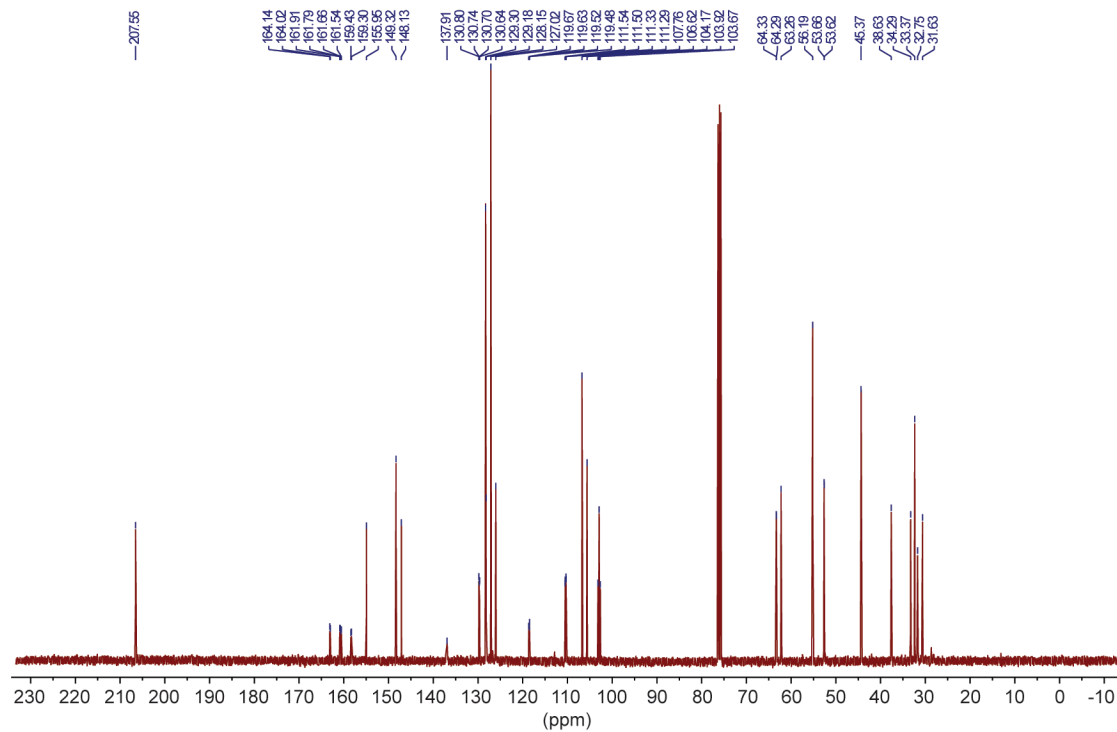

Fig. S65:  $^{13}\text{C}$  NMR spectrum for compound **8q** in  $\text{CDCl}_3$  (100 MHz).

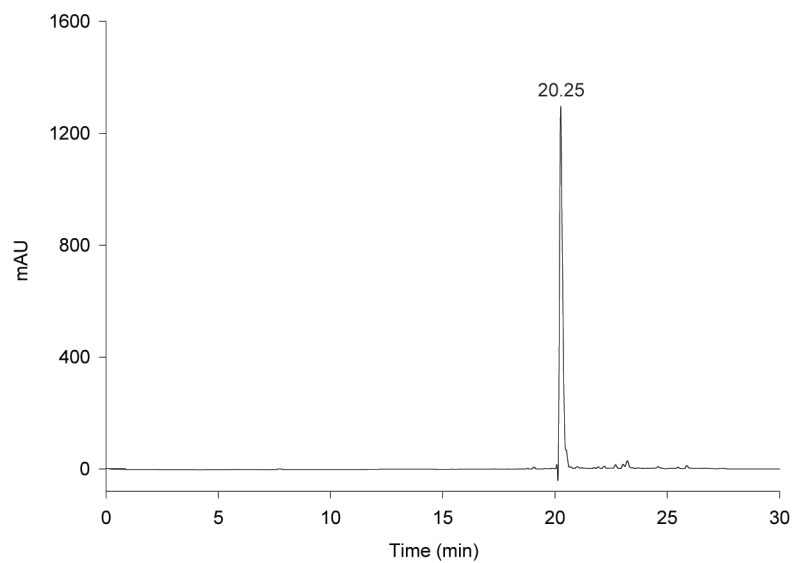

Fig. S66: HPLC trace for compound **8q**.  $R_t = 20.25$  min.

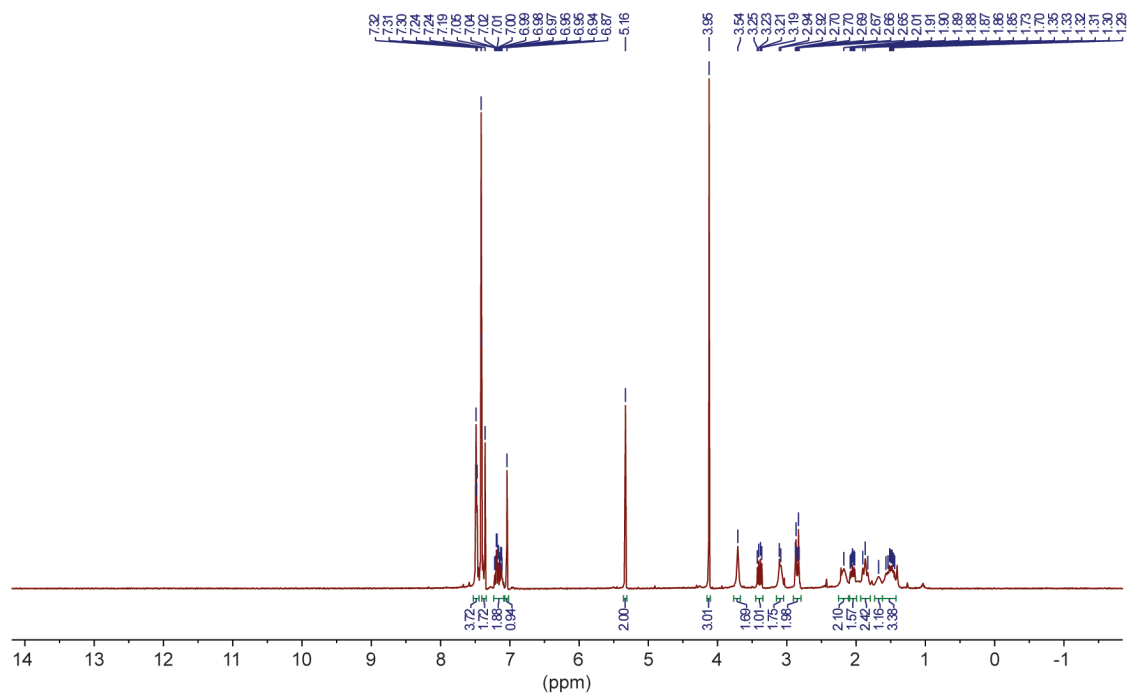

Fig. S67: <sup>1</sup>H NMR spectrum for compound **8r** in CDCl<sub>3</sub> (400 MHz).

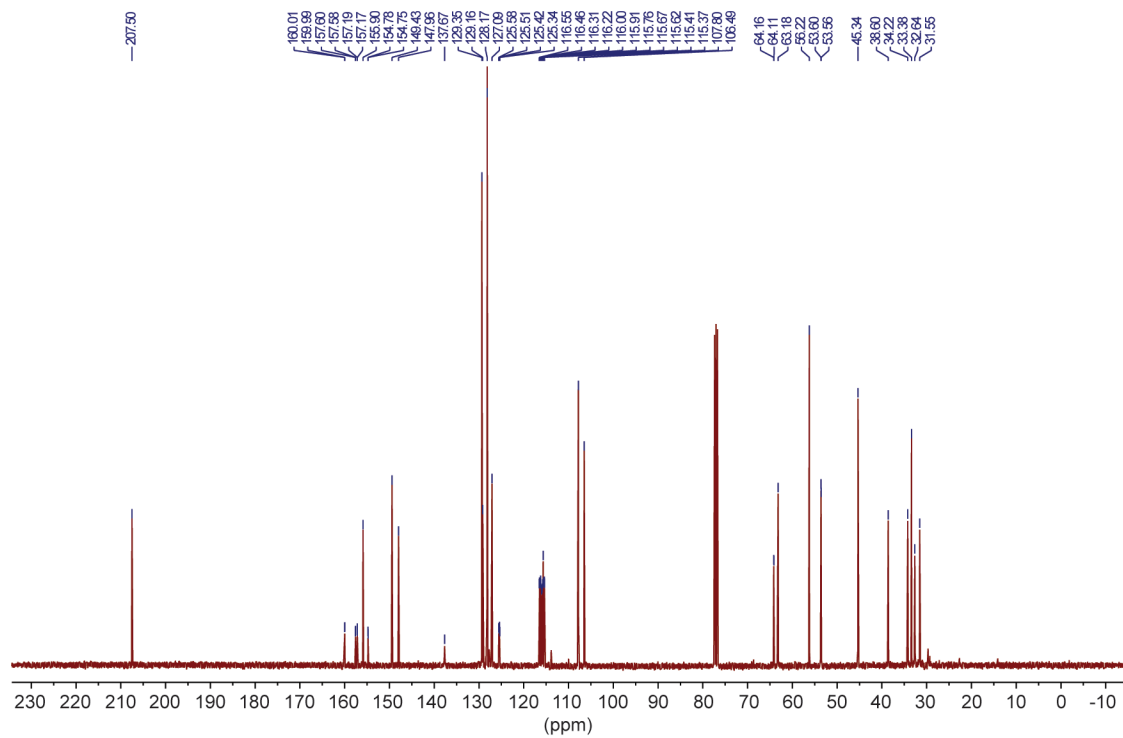

**Fig. S68:**  $^{13}\text{C}$  NMR spectrum for compound **8r** in  $\text{CDCl}_3$  (100 MHz).

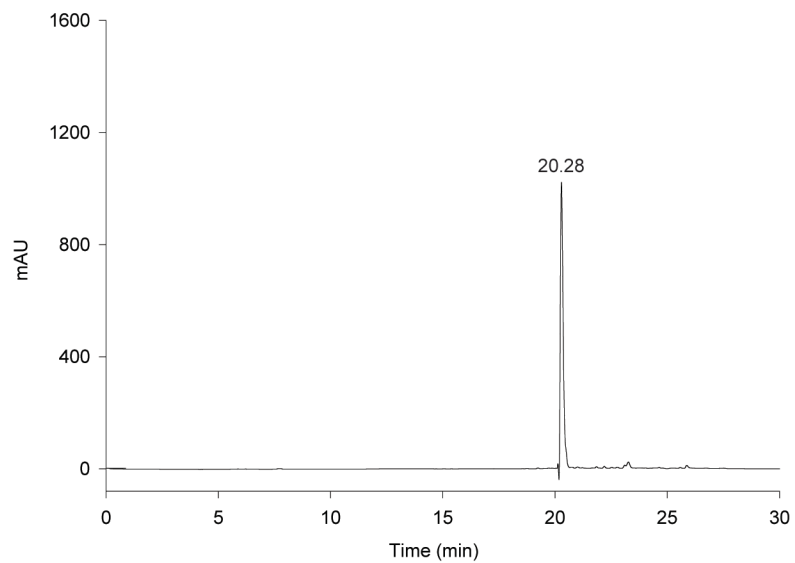

**Fig. S69:** HPLC trace for compound **8r**.  $R_t = 20.28$  min.

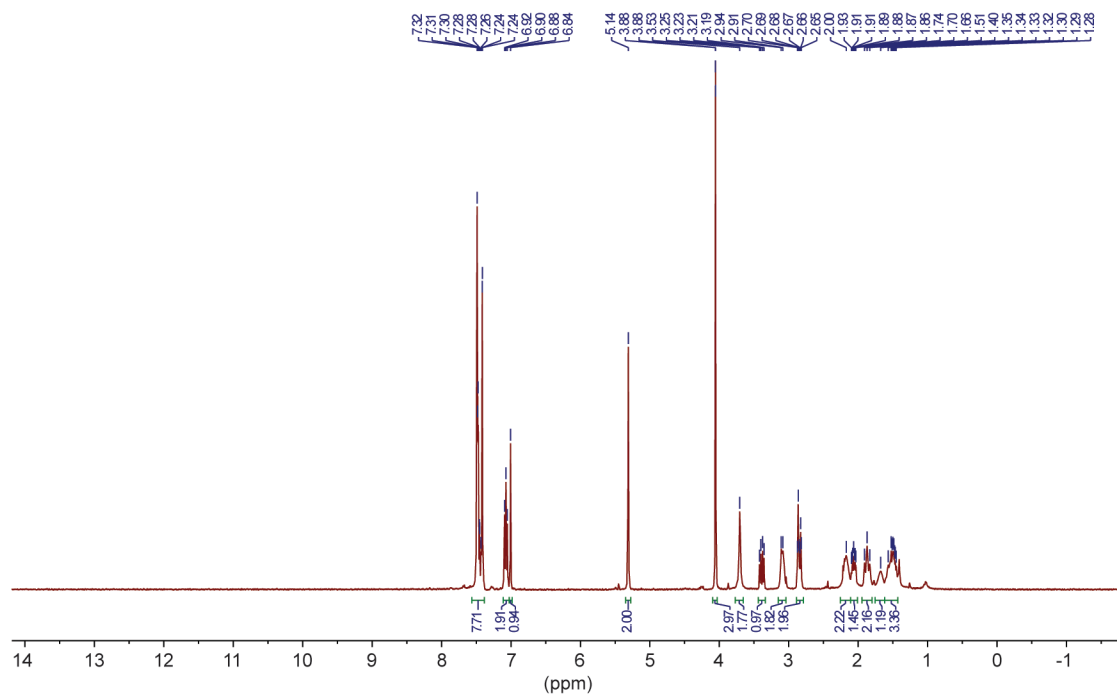

Fig. S70:  $^1\text{H}$  NMR spectrum for compound **8s** in  $\text{CDCl}_3$  (400 MHz).

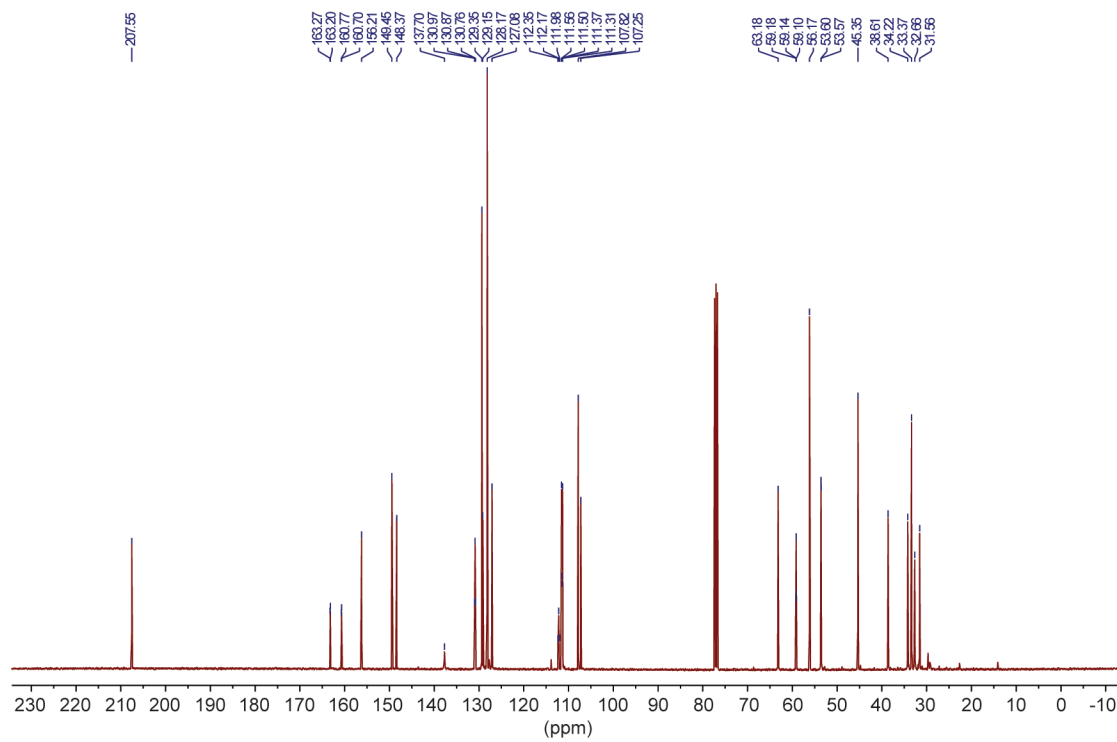

Fig. S71:  $^{13}\text{C}$  NMR spectrum for compound **8s** in  $\text{CDCl}_3$  (100 MHz).

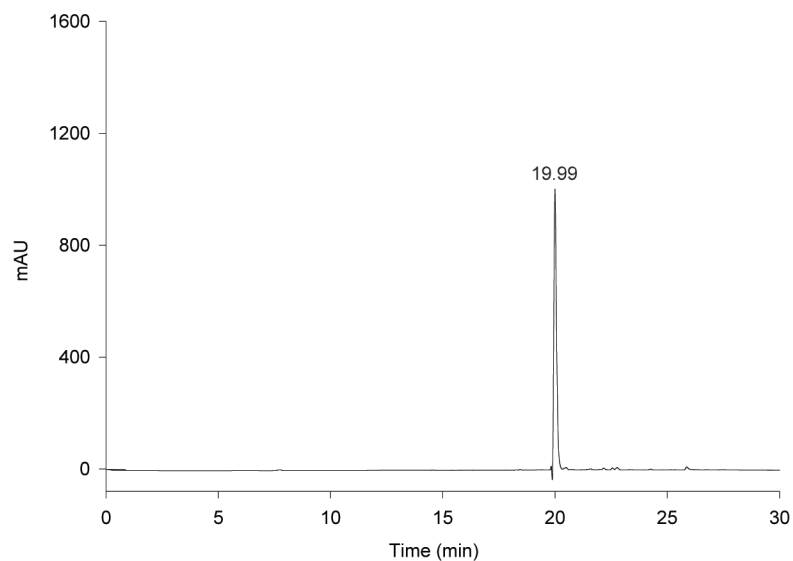

Fig. S72: HPLC trace for compound **8s**.  $R_t = 19.99$  min.

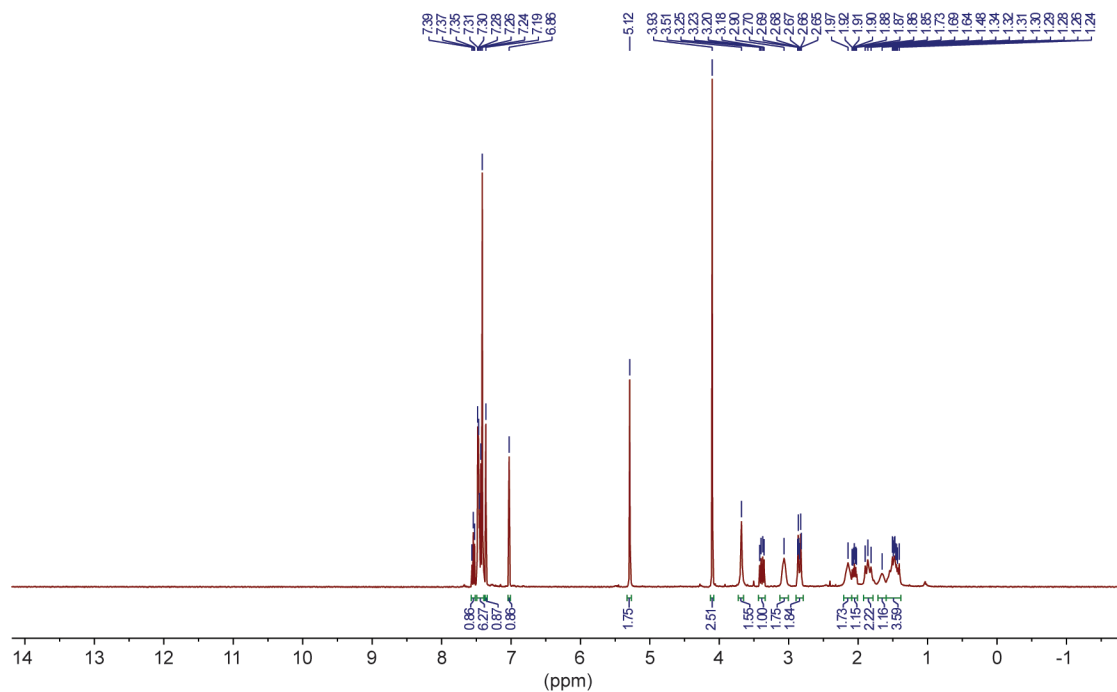

Fig. S73: <sup>1</sup>H NMR spectrum for compound **8t** in CDCl<sub>3</sub> (400 MHz).

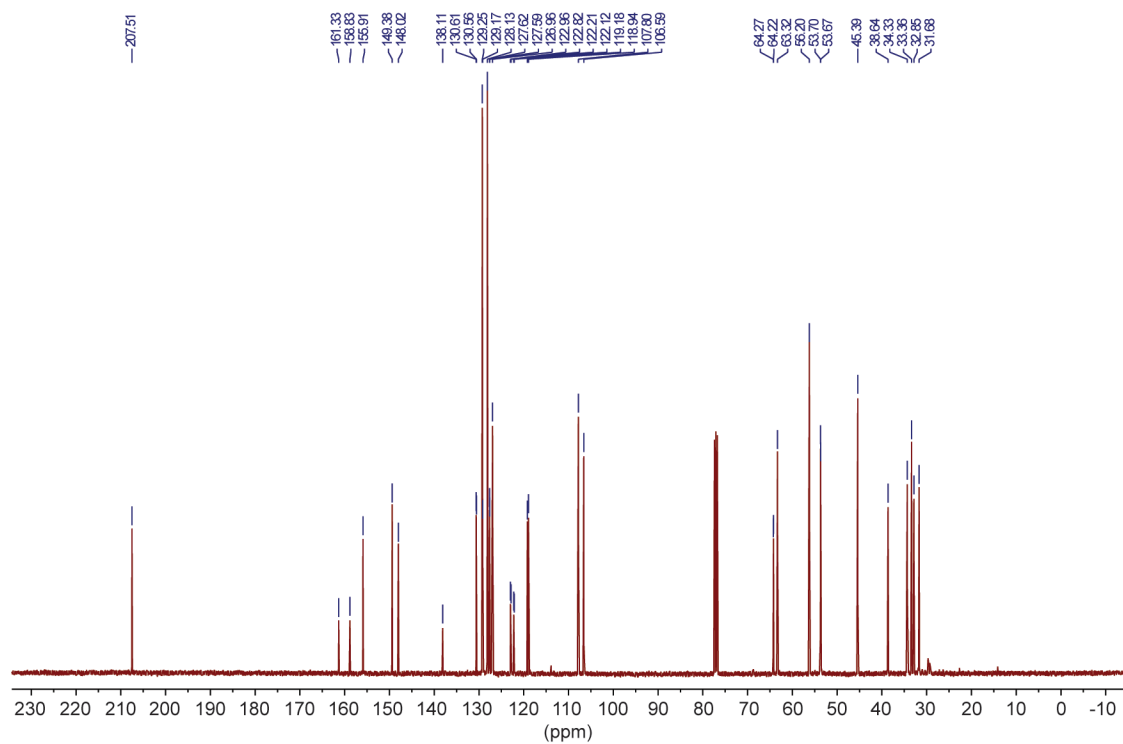

**Fig. S74:**  $^{13}\text{C}$  NMR spectrum for compound **8t** in  $\text{CDCl}_3$  (100 MHz).

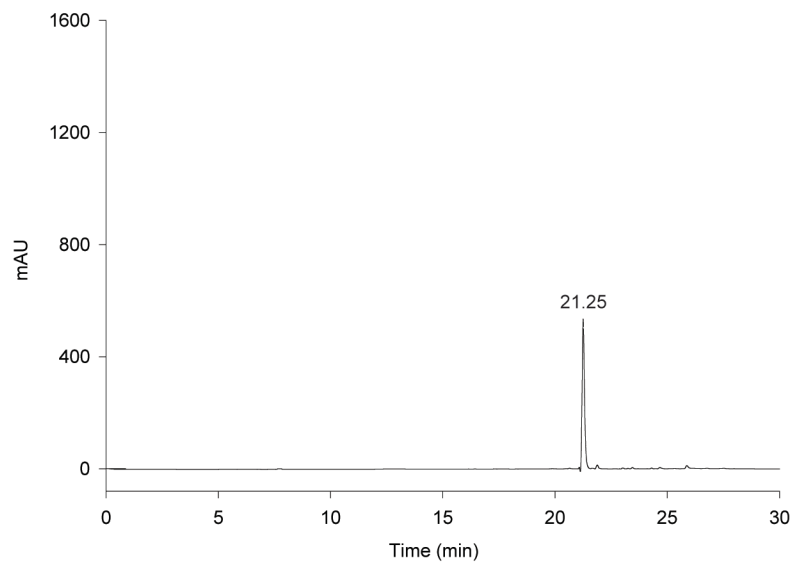

**Fig. S75:** HPLC trace for compound **8t**.  $R_t = 21.25$  min.

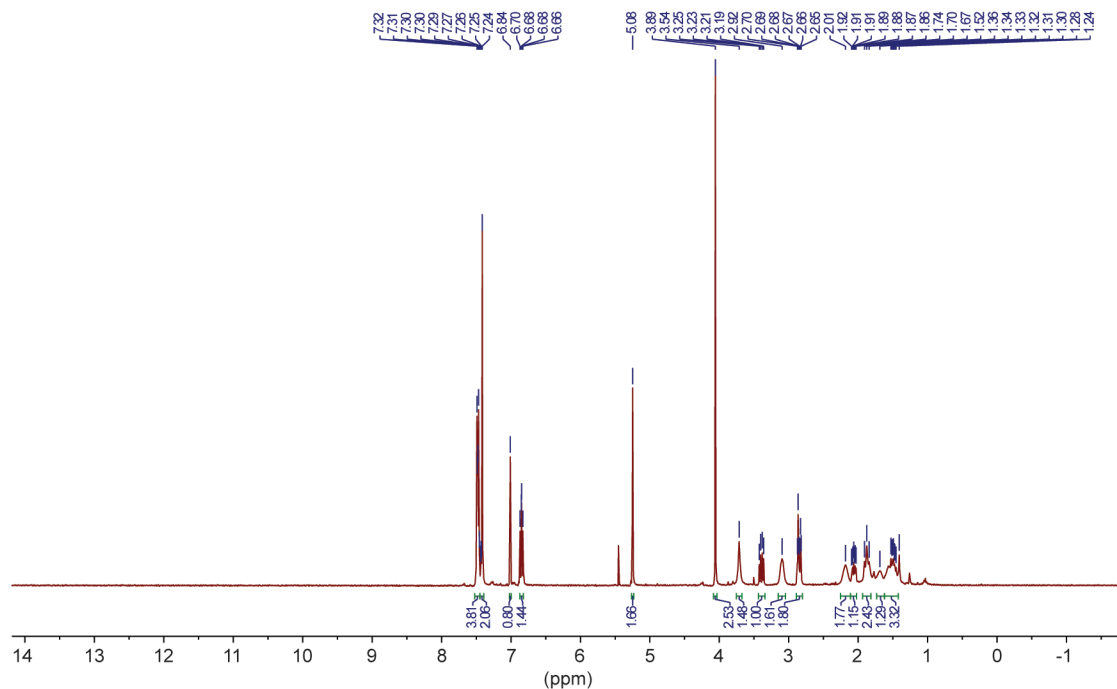

Fig. S76:  $^1\text{H}$  NMR spectrum for compound **8u** in  $\text{CDCl}_3$  (400 MHz).

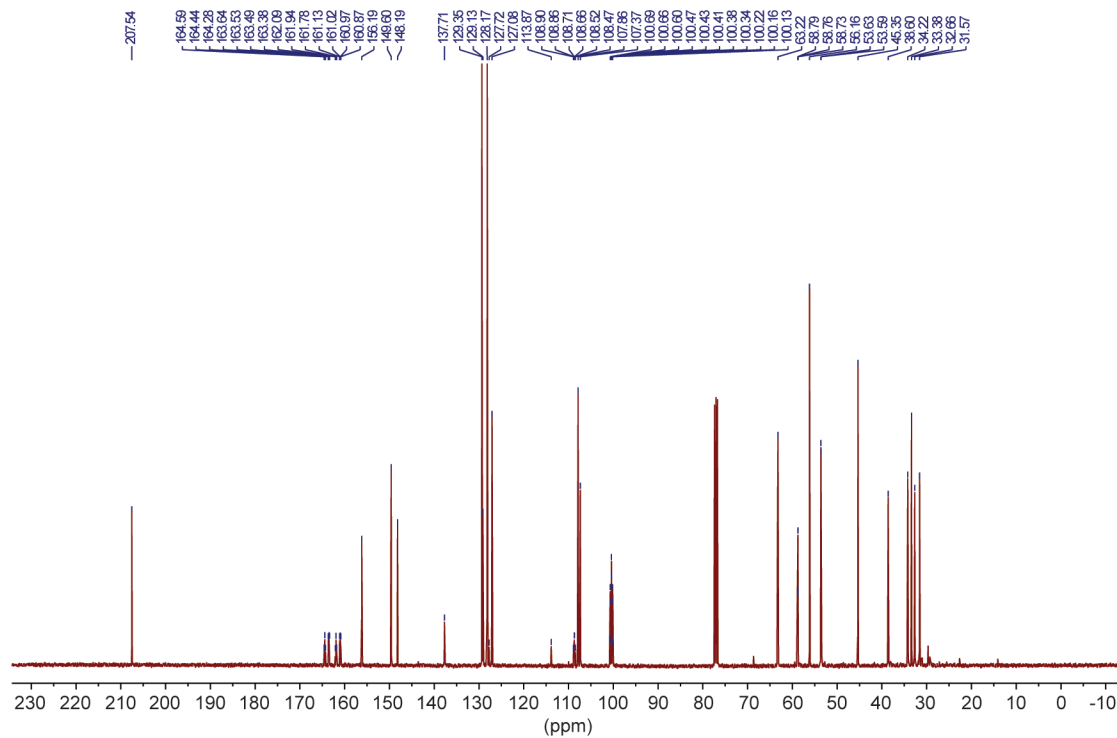

Fig. S77:  $^{13}\text{C}$  NMR spectrum for compound **8u** in  $\text{CDCl}_3$  (100 MHz).

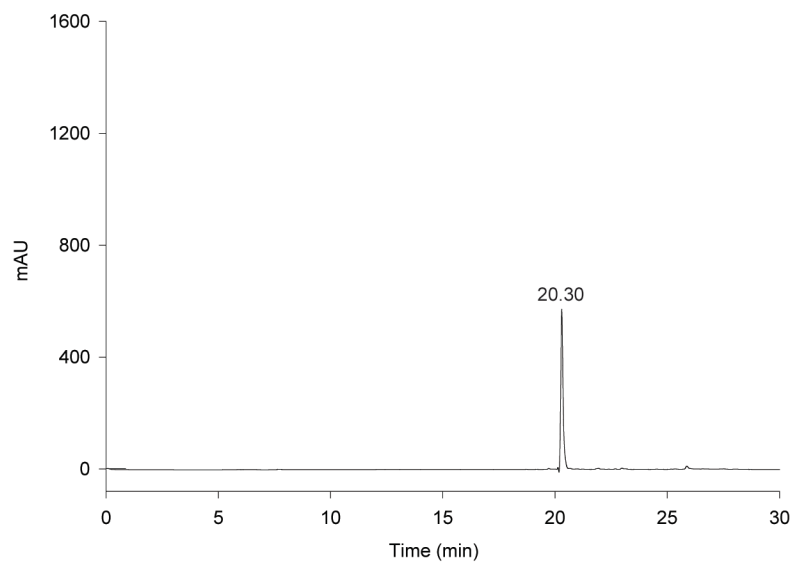

Fig. S78: HPLC trace for compound **8u**.  $R_t = 20.30$  min.

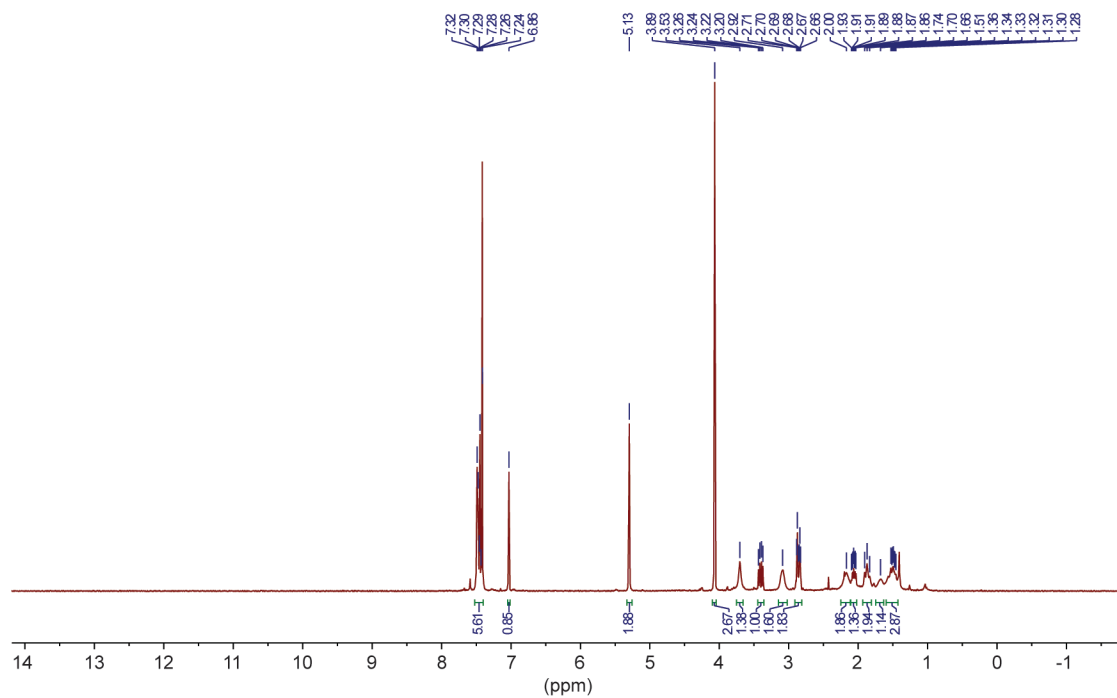

Fig. S79: <sup>1</sup>H NMR spectrum for compound **8v** in CDCl<sub>3</sub> (400 MHz).



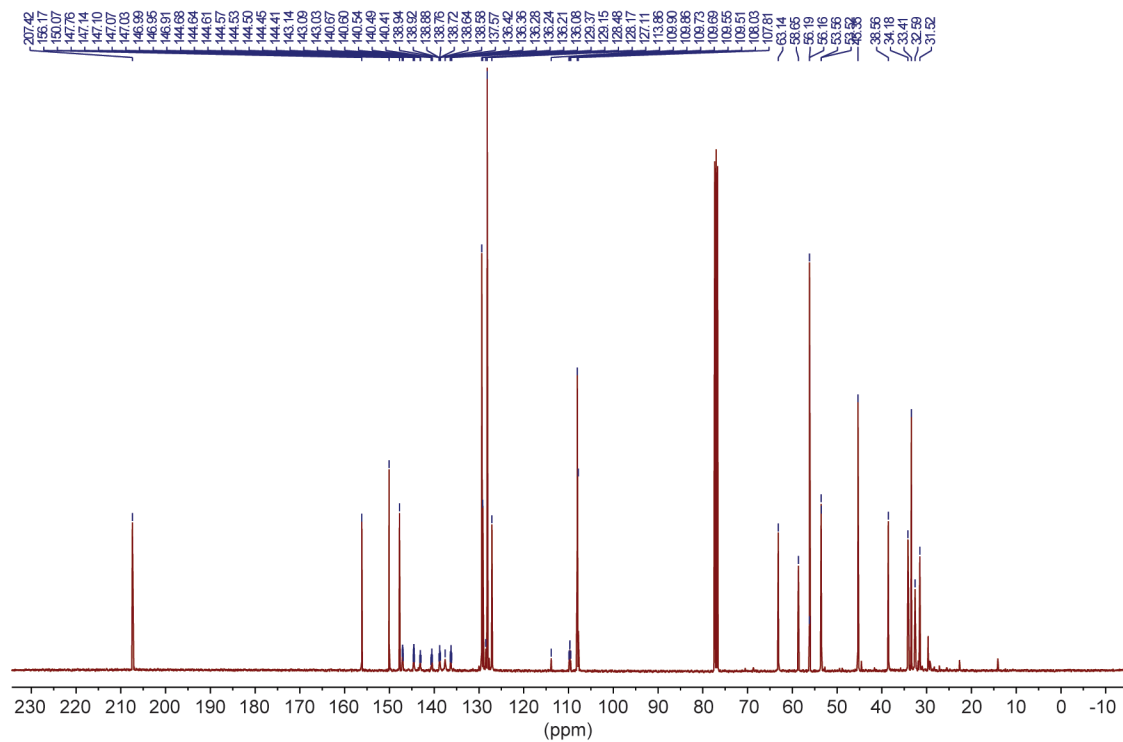

Fig. S80:  $^{13}\text{C}$  NMR spectrum for compound **8v** in  $\text{CDCl}_3$  (100 MHz).

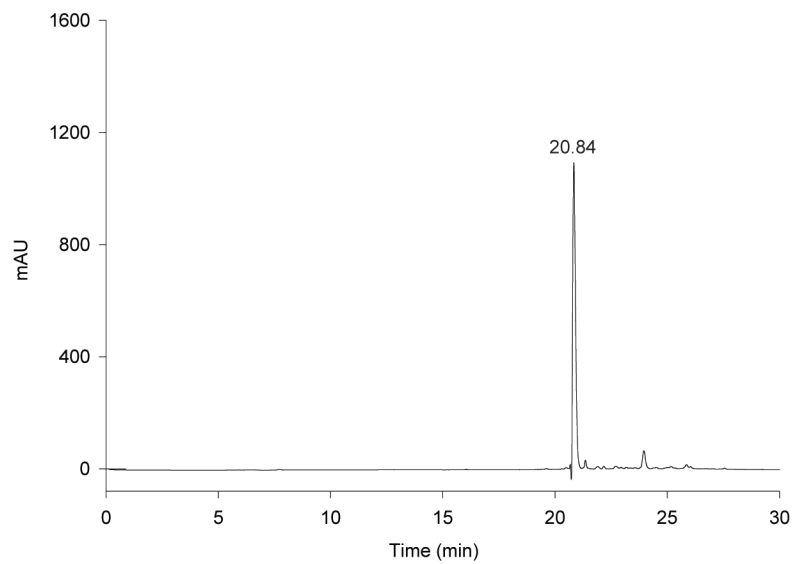

Fig. S81: HPLC trace for compound **8v**.  $R_t = 20.84$  min.

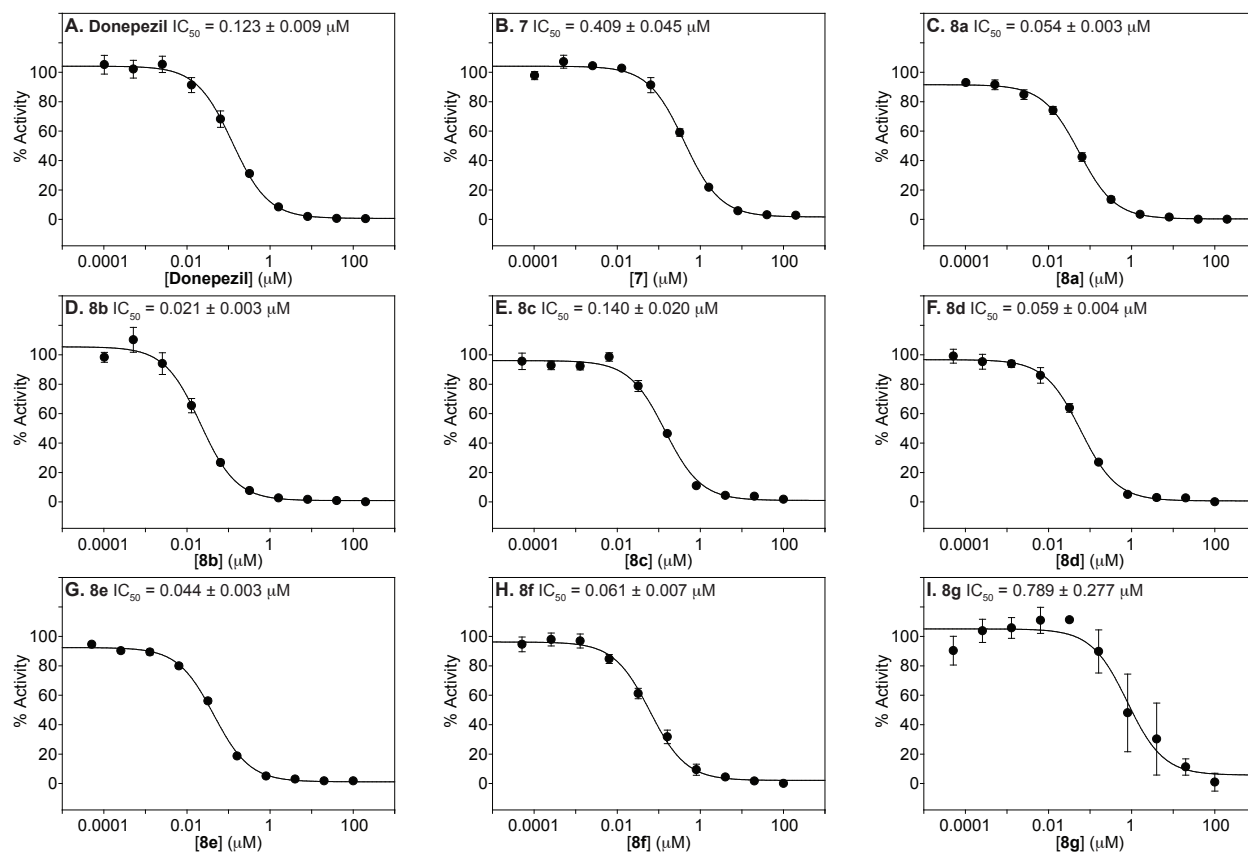

**Fig. S82:**  $\text{IC}_{50}$  curves for the inhibition of *EeAChE* by donepezil and its analogues 7-8g.

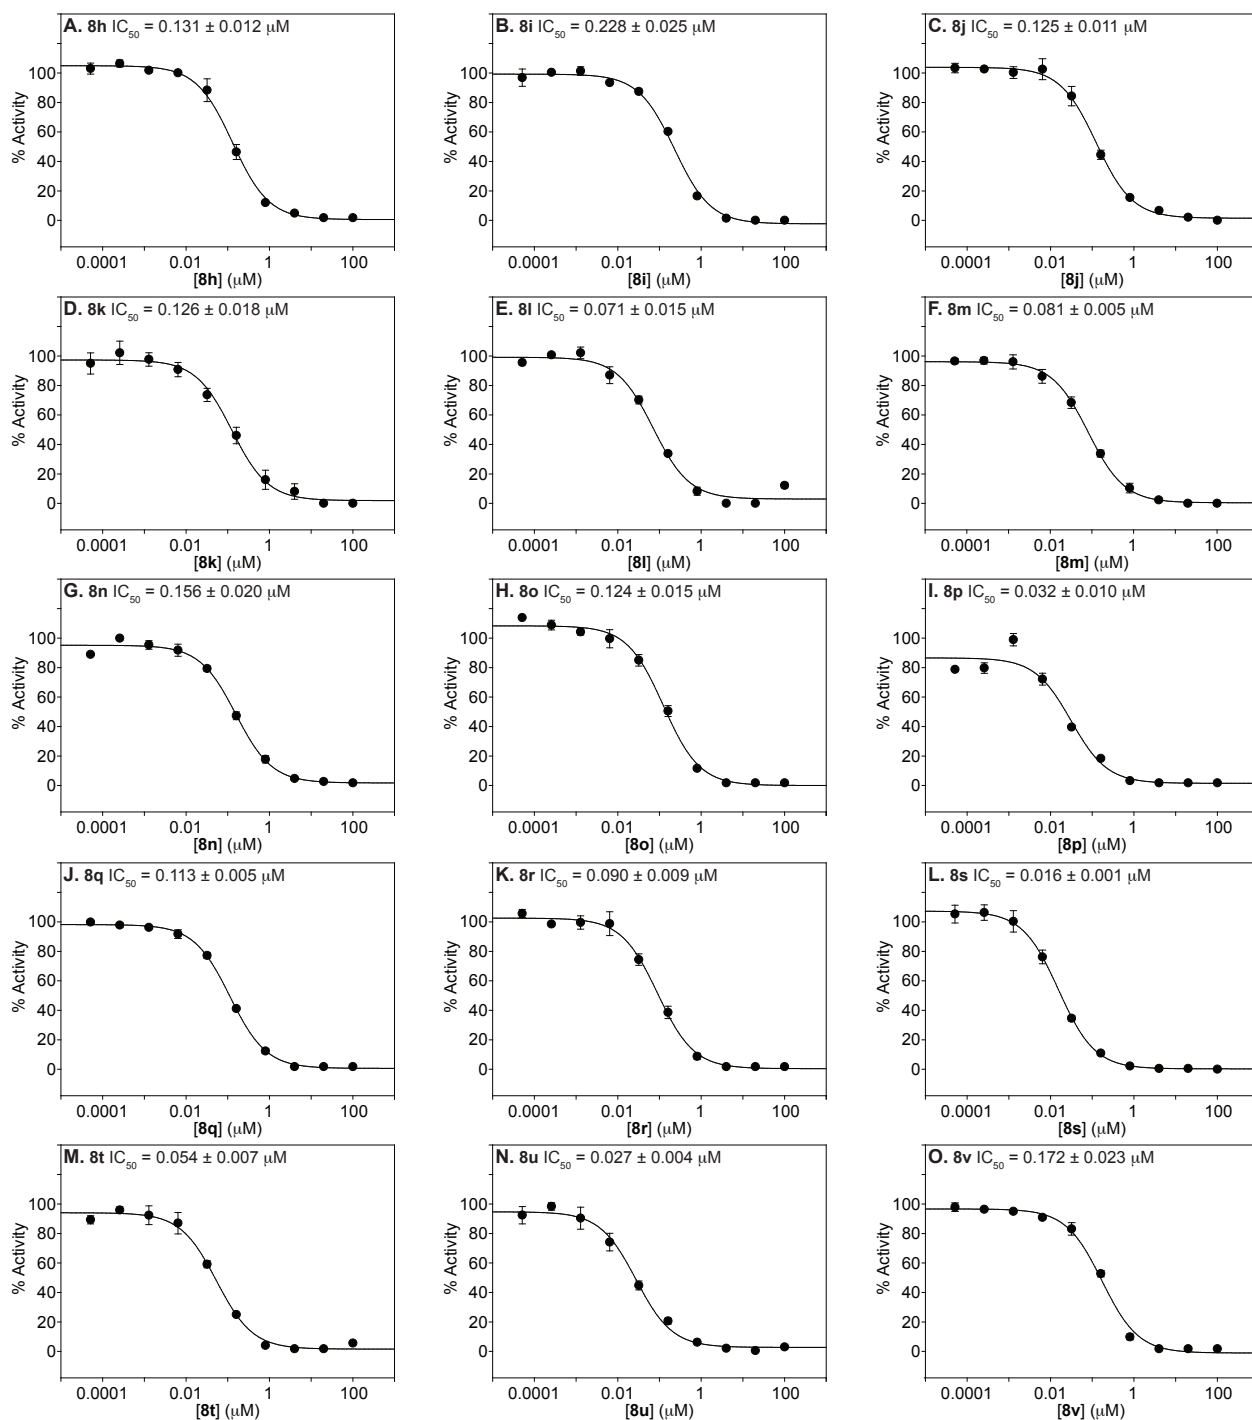

**Fig. S83:**  $IC_{50}$  curves for the inhibition of *EeAChE* by donepezil analogues **8h-v**.

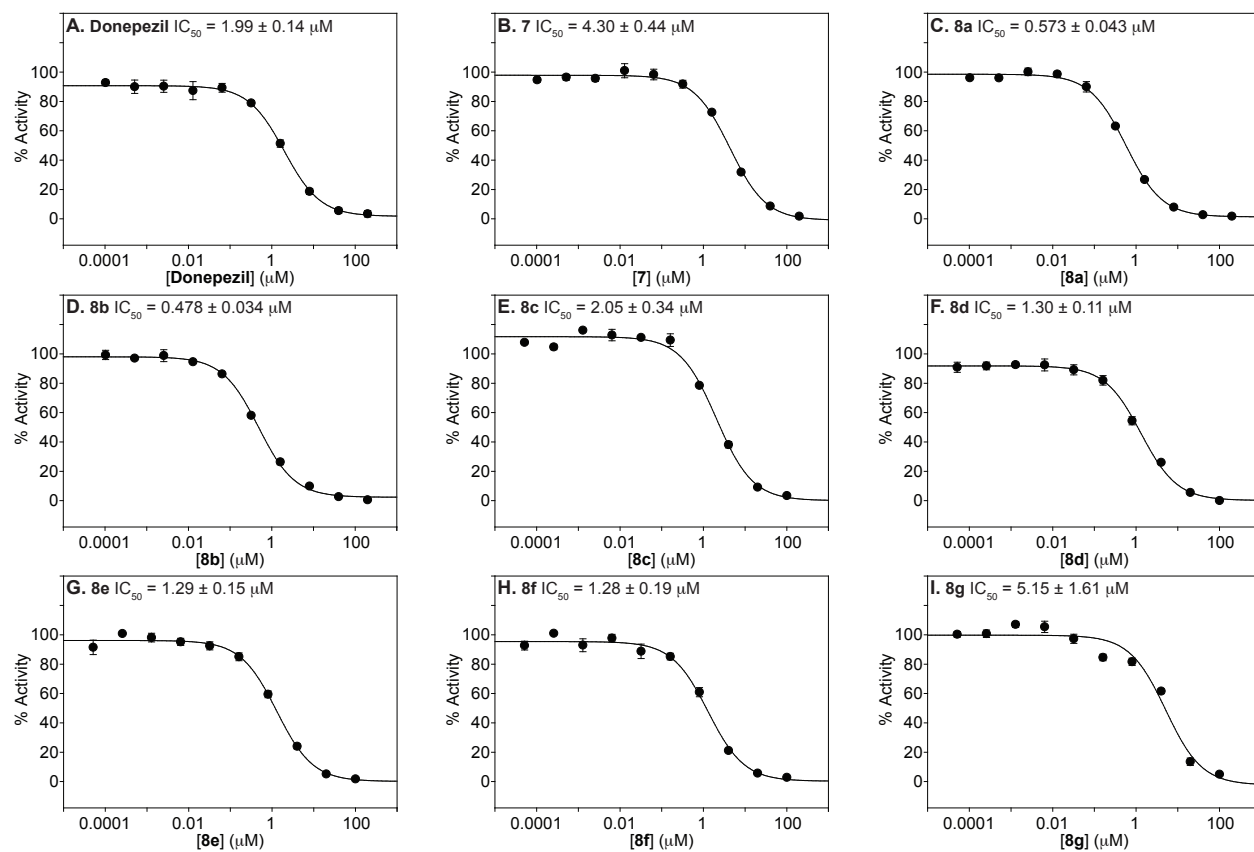

**Fig. S84:**  $IC_{50}$  curves for the inhibition of *E/BChE* by donepezil and its analogues **7-8g**.

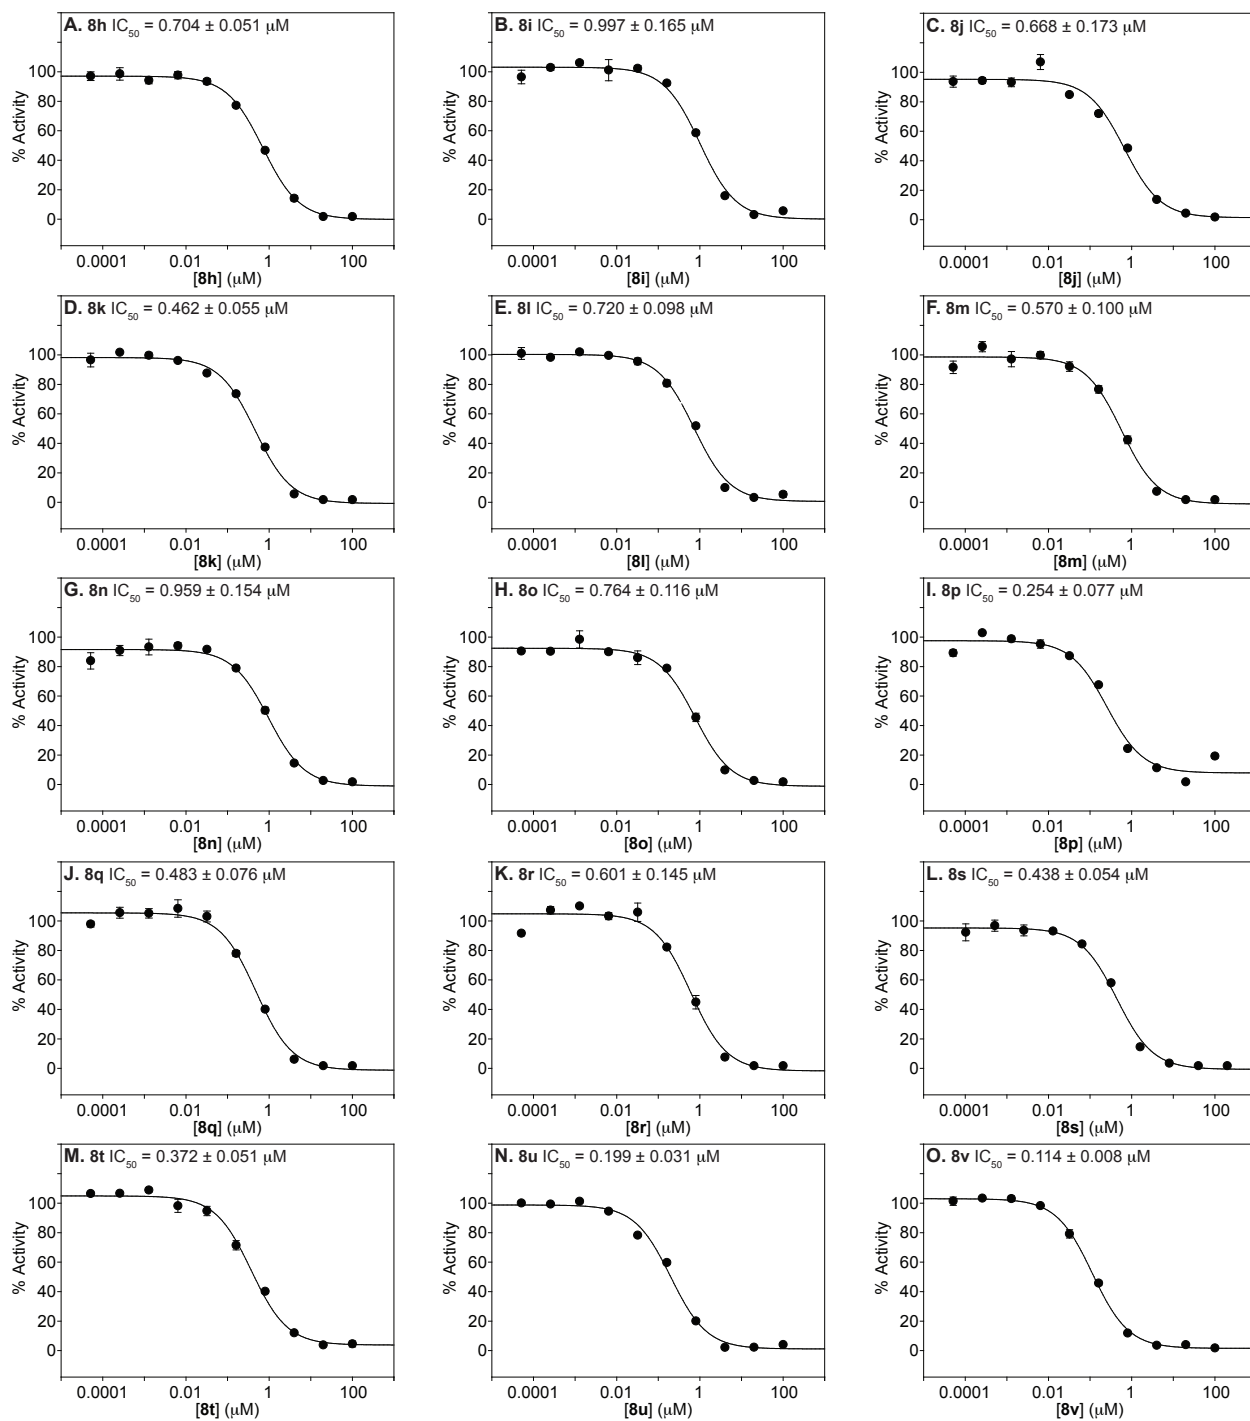

**Fig. S85:**  $IC_{50}$  curves for the inhibition of *EfbChE* by donepezil analogues **8h-v**.

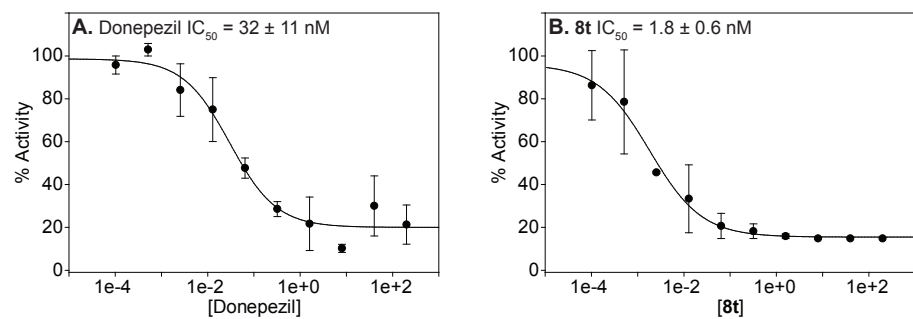

**Fig. S86:**  $IC_{50}$  curves for the inhibition of *HsAChE* by donepezil and its analogue **8t**.

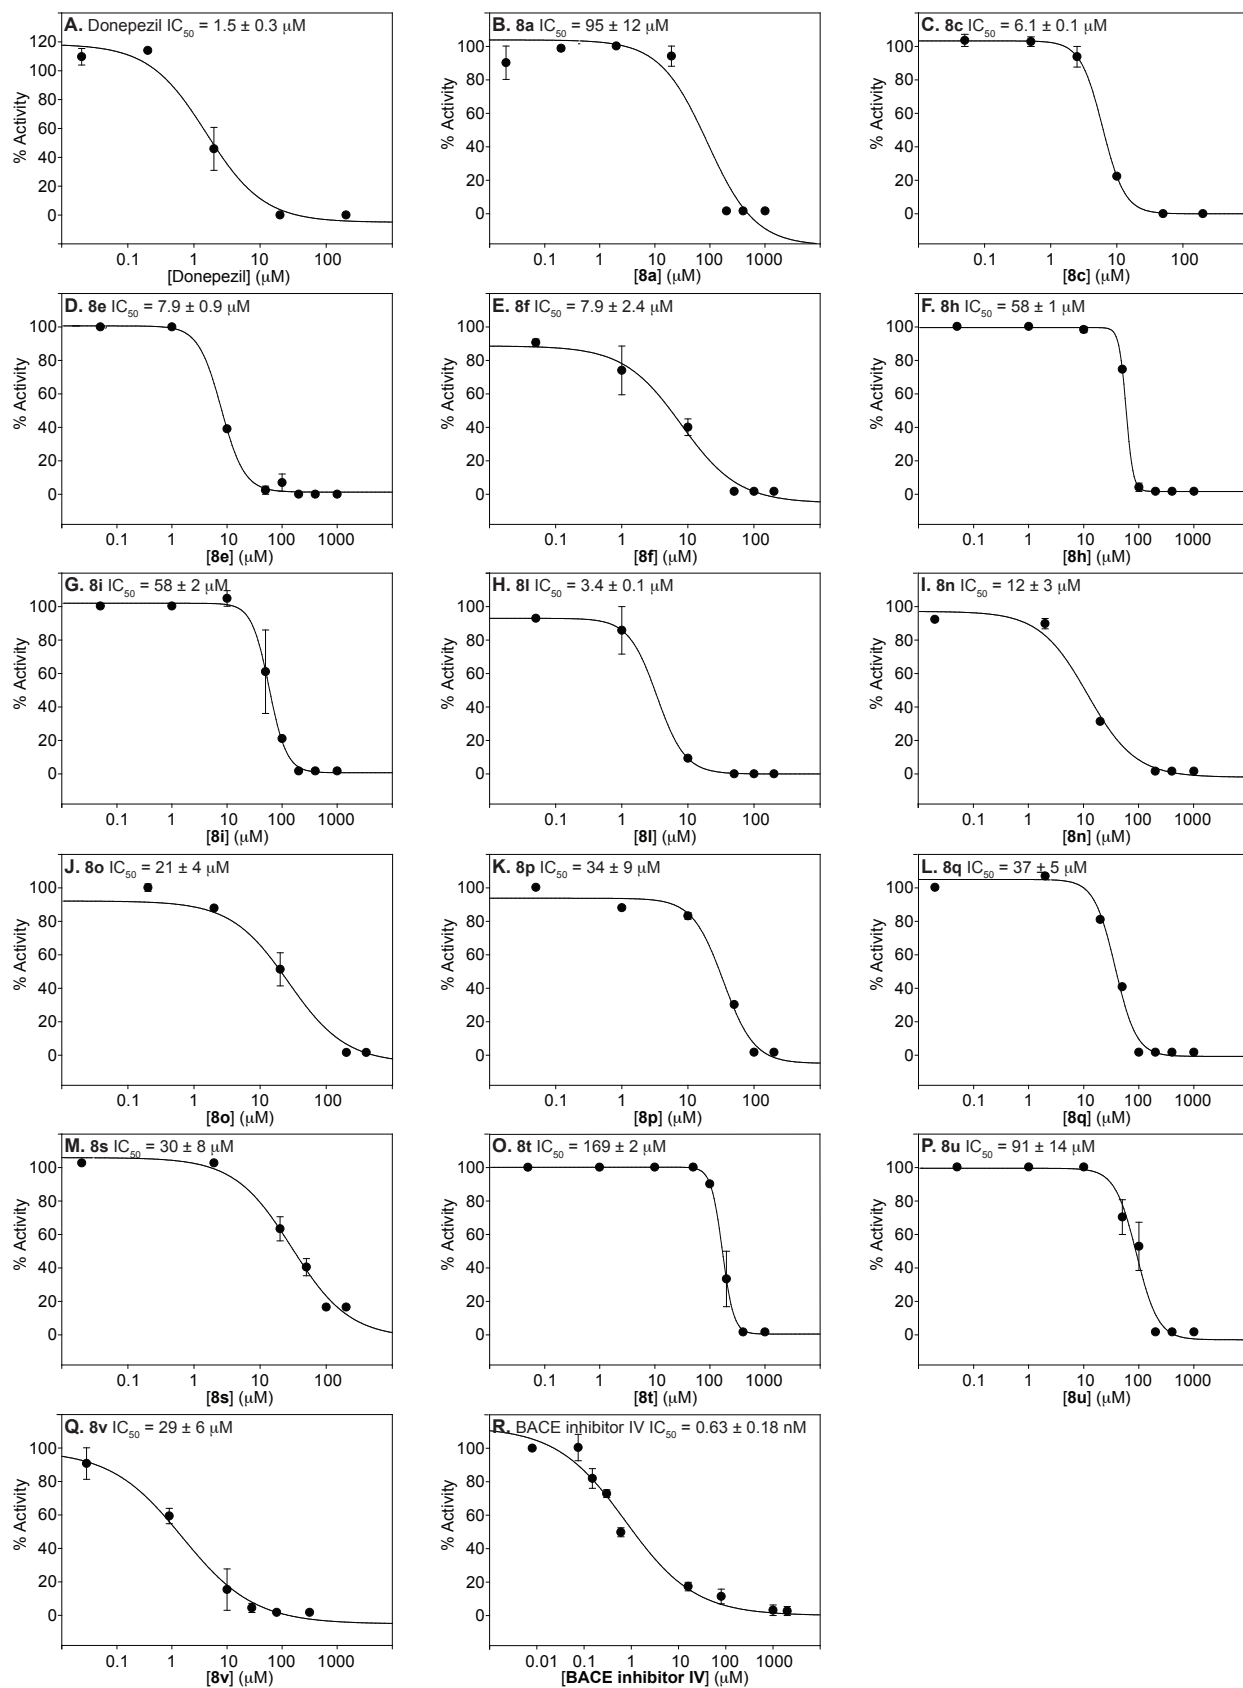

**Fig. S87:**  $IC_{50}$  curves for **A.** donepezil and **B-Q.** its analogues, as well as **R.** for BACE inhibitor IV.

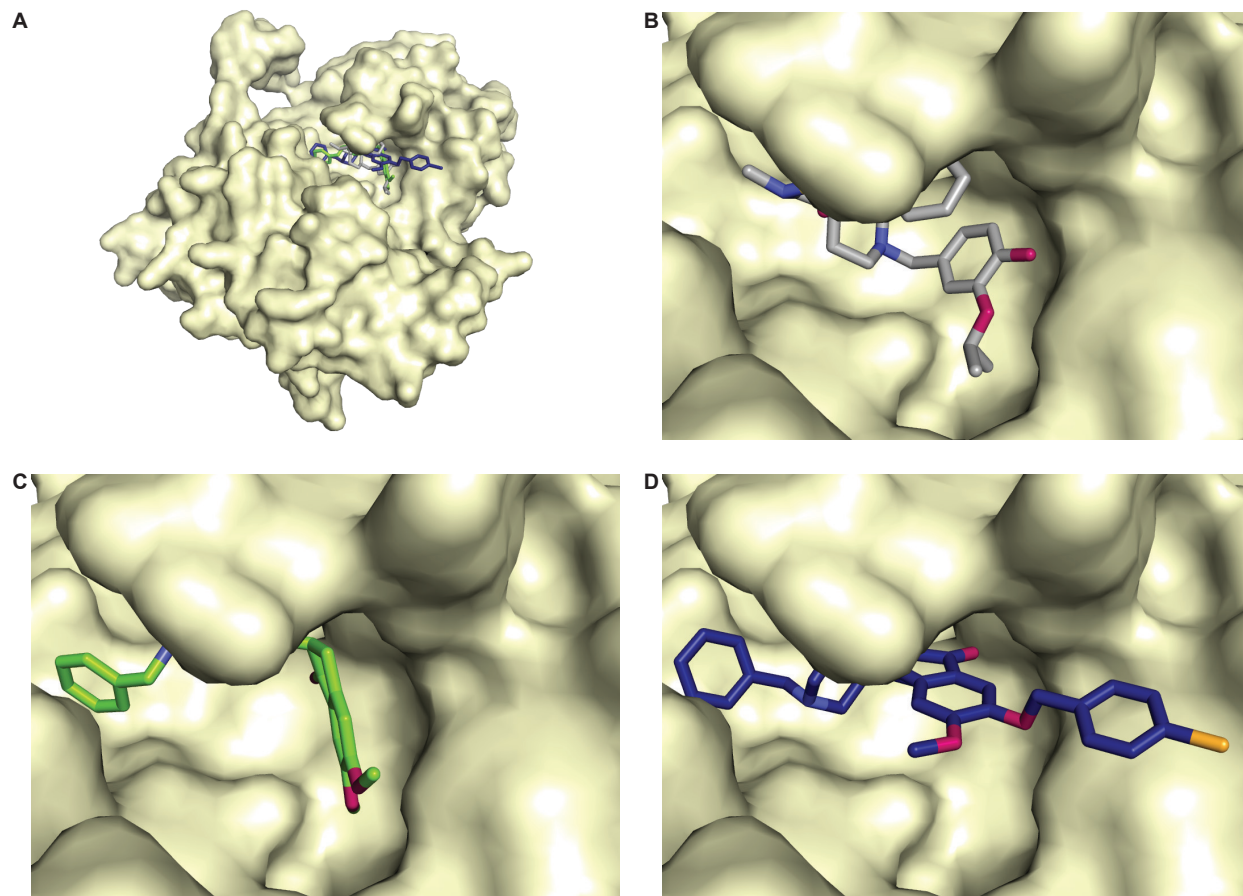

**Fig. S88:** Molecular docking showing the overlay of donepezil (green) and compound **81** (navy blue) with the known BACE1 inhibitor (gray) crystallized with BACE1 (PDB# 4FM7) shown as surface representations. Panel **A** shows the three compounds in the active site of BACE1. Panels **B-D** show the zoomed-in view of the known inhibitor (**B**), donepezil (**C**), and compound **81** (**D**). *Note:* This is the exact same figure as Fig. 1 in the main text to help visualize the space available to BACE1 inhibitor binding.
